# Supplementary material
Source: publisher figshare collection journal article supplement (https://gsajournals.figshare.com/articles/dataset/_/7489625)
Supplement: Supplementary file 1 [file 1]

## Sheet: WT_McSC_Harris et al. 2018
original data from NCBI GEO #GSE102271; Harris et al. 2018
ENSEMBL GENE ID	SAMPLE_B1	SAMPLE_B2	SAMPLE_B3	AVERAGE	GENE SYMBOL	PERCENT RANK
ENSMUSG00000001506	452481	728298	916314	699031	Col1a1	1
ENSMUSG00000029661	359584	640538	856039	618720	Col1a2	0.999
ENSMUSG00000064351	457901	383224	402281	414469	COX1	0.999
ENSMUSG00000026043	185993	351328	476052	337791	Col3a1	0.999
ENSMUSG00000022129	257470	307023	209243	257912	Dct	0.999
ENSMUSG00000037742	249774	260092	240136	250001	Eef1a1	0.999
ENSMUSG00000021250	241495	204143	287917	244519	Fos	0.999
ENSMUSG00000003545	224734	174576	301600	233637	Fosb	0.999
ENSMUSG00000038418	214045	152753	228007	198268	Egr1	0.999
ENSMUSG00000064370	172804	150432	151025	158087	CYTB	0.999
ENSMUSG00000019929	77927.3	155867	222570	152121	Dcn	0.999
ENSMUSG00000026879	88117.7	139830	195983	141310	Gsn	0.999
ENSMUSG00000018593	83170.6	142894	195864	140643	Sparc	0.999
ENSMUSG00000034994	142141	139733	127039	136304	Eef2	0.999
ENSMUSG00000069833	148666	122729	134170	135188	Ahnak	0.999
ENSMUSG00000026728	121072	142646	123359	129026	Vim	0.999
ENSMUSG00000052684	100512	91748.5	134798	109020	Jun	0.999
ENSMUSG00000023944	101427	90886.5	90219.5	94177.7	Hsp90ab1	0.999
ENSMUSG00000020719	88982.1	86061.9	93331.6	89458.5	Ddx5	0.999
ENSMUSG00000052837	87283.9	80687.9	87844.6	85272.1	Junb	0.999
ENSMUSG00000002985	107696	59333.6	75545.6	80858.5	Apoe	0.999
ENSMUSG00000000787	77876.7	75134.1	77940.3	76983.7	Ddx3x	0.999
ENSMUSG00000015656	82310.5	71852.6	70696.5	74953.2	Hspa8	0.999
ENSMUSG00000025359	72881.2	91746.5	56660.5	73762.7	Pmel	0.999
ENSMUSG00000003032	69583.8	61177.8	84153.1	71638.3	Klf4	0.999
ENSMUSG00000064341	75783.2	71405.2	67541.5	71576.6	ND1	0.999
ENSMUSG00000020315	64775.9	73568.9	75973.3	71439.3	Sptbn1	0.999
ENSMUSG00000029580	68628.8	74473.2	70384.8	71162.3	Actb	0.999
ENSMUSG00000032332	68526.5	78396.4	58307.5	68410.1	Col12a1	0.999
ENSMUSG00000024335	64867.6	65539.7	72196.1	67534.5	Brd2	0.999
ENSMUSG00000023034	70419.7	56940.1	71866.7	66408.8	Nr4a1	0.999
ENSMUSG00000005994	64882.3	76787.8	57532.6	66400.9	Tyrp1	0.999
ENSMUSG00000061527	86119.1	45626.5	64230.6	65325.4	Krt5	0.998
ENSMUSG00000039218	70347	57573.1	66436.1	64785.4	Srrm2	0.998
ENSMUSG00000086503	72350.9	55740.4	65339.1	64476.8	Xist	0.998
ENSMUSG00000054146	85465.5	44396.1	62042.9	63968.2	Krt15	0.998
ENSMUSG00000028063	69461.5	58548.6	62273	63427.7	Lmna	0.998
ENSMUSG00000033161	64253	69505.2	55232	62996.8	Atp1a1	0.998
ENSMUSG00000022462	69918	56145.4	60401.1	62154.8	Slc38a2	0.998
ENSMUSG00000064367	65472.7	65634.9	55078.3	62062	ND5	0.998
ENSMUSG00000007850	64545	54409.9	66093.1	61682.7	Hnrnph1	0.998
ENSMUSG00000026131	69223.3	58151.3	57588.1	61654.2	Dst	0.998
ENSMUSG00000064345	62288.1	59071.9	55100.2	58820.1	ND2	0.998
ENSMUSG00000092341	59623.2	52200.1	63429.6	58417.6	Malat1	0.998
ENSMUSG00000073411	51796.2	57402.8	62587.8	57262.3	H2-D1	0.998
ENSMUSG00000022961	57810.1	54953.5	55137.9	55967.2	Son	0.998
ENSMUSG00000060126	56284.8	55401.8	53724	55136.9	Tpt1	0.998
ENSMUSG00000040435	57518.1	48756	55876.2	54050.1	Ppp1r15a	0.998
ENSMUSG00000026864	50124.4	51429.5	59686.9	53746.9	Hspa5	0.998
ENSMUSG00000026185	27448.8	54606.2	78418.2	53491.1	Igfbp5	0.998
ENSMUSG00000026628	58279.2	38324.7	61452.1	52685.3	Atf3	0.998
ENSMUSG00000044786	56600	38953.8	60164.8	51906.2	Zfp36	0.998
ENSMUSG00000033327	41404.5	52690.7	61439.5	51844.9	Tnxb	0.998
ENSMUSG00000037266	55348.7	47335.1	50728	51137.3	Rsrp1	0.998
ENSMUSG00000019505	48744.5	50393.4	53483.5	50873.8	Ubb	0.998
ENSMUSG00000041936	51609.7	47906.5	50414.3	49976.8	Agrn	0.998
ENSMUSG00000020473	34536.8	52231.9	62606.6	49791.8	Aebp1	0.998
ENSMUSG00000025064	66119.9	32636.1	50172.7	49642.9	Col17a1	0.998
ENSMUSG00000021134	50102.2	46461.6	51525.9	49363.2	Srsf5	0.998
ENSMUSG00000106106	98112	25118.8	22897.6	48709.5	NA	0.998
ENSMUSG00000027750	57827	32010.8	54607.7	48148.5	Postn	0.998
ENSMUSG00000040249	35172.5	47745.9	60476.4	47798.2	Lrp1	0.998
ENSMUSG00000004207	40308.2	47560.2	49951	45939.8	Psap	0.998
ENSMUSG00000006932	45651.7	52052	39206	45636.5	Ctnnb1	0.997
ENSMUSG00000022892	46680.5	44166.1	44546.6	45131.1	App	0.997
ENSMUSG00000032216	43867	46316.3	42459.3	44214.2	Nedd4	0.997
ENSMUSG00000029816	43598.2	53217.9	33784.8	43533.7	Gpnmb	0.997
ENSMUSG00000004980	46054.3	41187.7	43052.2	43431.4	Hnrnpa2b1	0.997
ENSMUSG00000005610	44283.4	40657.6	43225.8	42722.3	Eif4g2	0.997
ENSMUSG00000017466	30796.7	45308.1	51770.6	42625.1	Timp2	0.997
ENSMUSG00000067274	43349.4	44129.6	40006	42495	Rplp0	0.997
ENSMUSG00000061232	42039.1	39947.6	45288	42424.9	H2-K1	0.997
ENSMUSG00000022425	39156	48003.7	38869.3	42009.7	Enpp2	0.997
ENSMUSG00000073418	37372.4	42932.8	42347.4	40884.2	C4b	0.997
ENSMUSG00000026193	22138	38937.5	60780.7	40618.7	Fn1	0.997
ENSMUSG00000024661	34245.9	44457.6	43151.6	40618.4	Fth1	0.997
ENSMUSG00000026238	38469.8	40349.7	42259.6	40359.7	Ptma	0.997
ENSMUSG00000039899	40725.7	33862.7	46268.9	40285.8	Fgl2	0.997
ENSMUSG00000024190	35214.6	35944.6	49555.7	40238.3	Dusp1	0.997
ENSMUSG00000032399	41133.6	39803.3	39768.6	40235.2	Rpl4	0.997
ENSMUSG00000060802	35679.5	39275.1	42369.4	39108	B2m	0.997
ENSMUSG00000028649	39839.1	38280.4	34999	37706.2	Macf1	0.997
ENSMUSG00000096054	33903.3	46083.5	32401.3	37462.7	Syne1	0.997
ENSMUSG00000005672	35724.8	44419.2	31007.4	37050.4	Kit	0.997
ENSMUSG00000015837	35635.2	37580	37532.8	36916	Sqstm1	0.997
ENSMUSG00000031328	34972.2	37520.4	37608.1	36700.2	Flna	0.997
ENSMUSG00000040488	25445.9	43905.4	40290.4	36547.2	Ltbp4	0.997
ENSMUSG00000018707	37342.9	37369.4	33945.9	36219.4	Dync1h1	0.997
ENSMUSG00000028195	36717.8	34782.4	35815.7	35772	Cyr61	0.997
ENSMUSG00000025261	37957.5	34646.8	34608.9	35737.7	Huwe1	0.997
ENSMUSG00000034593	39129.7	34024.3	32035.3	35063.1	Myo5a	0.997
ENSMUSG00000070436	23877.3	37172.1	42816.9	34622.1	Serpinh1	0.997
ENSMUSG00000021270	42603.1	29076.6	32010.2	34563.3	Hsp90aa1	0.997
ENSMUSG00000035673	34438.8	34295.6	34413.3	34382.6	Sbno2	0.997
ENSMUSG00000022884	32228.2	33146	37566.3	34313.5	Eif4a2	0.996
ENSMUSG00000040690	27342.3	35926.3	39513.4	34260.7	Col16a1	0.996
ENSMUSG00000031451	18945	35166.3	48558.1	34223.1	Gas6	0.996
ENSMUSG00000060036	33691.4	35433.7	33004.7	34043.3	Rpl3	0.996
ENSMUSG00000031996	31392.3	36671.9	33690.7	33918.3	Aplp2	0.996
ENSMUSG00000064339	48982.7	26344.4	26176	33834.4	NA	0.996
ENSMUSG00000016559	32792.2	32785.2	34926.8	33501.4	H3f3b	0.996
ENSMUSG00000064337	38926.2	34009	26913.3	33282.8	NA	0.996
ENSMUSG00000057738	30815.7	34204.3	32748.5	32589.5	Sptan1	0.996
ENSMUSG00000027204	23433.5	30222.4	42718.6	32124.9	Fbn1	0.996
ENSMUSG00000022108	29785.8	32260.9	33803.7	31950.1	Itm2b	0.996
ENSMUSG00000028763	26850	32229.2	36350.1	31809.8	Hspg2	0.996
ENSMUSG00000035493	26929.1	29573	38036.8	31513	Tgfbi	0.996
ENSMUSG00000027620	31769.7	29728.9	32717.1	31405.2	Rbm39	0.996
ENSMUSG00000025283	31155.1	30651.4	31858.6	31221.7	Sat1	0.996
ENSMUSG00000026034	30724	29562.4	32996.4	31094.3	Clk1	0.996
ENSMUSG00000026234	32074.3	30944.9	29996.1	31005.1	Ncl	0.996
ENSMUSG00000064363	33797.9	28636.9	30258.6	30897.8	ND4	0.996
ENSMUSG00000038393	27838.8	27055.4	37058	30650.7	Txnip	0.996
ENSMUSG00000021910	30479.4	29190.1	32237.1	30635.6	Nisch	0.996
ENSMUSG00000025982	31795	27266	31716.4	30259.1	Sf3b1	0.996
ENSMUSG00000059796	30755.6	28194.4	30663.3	29871.1	Eif4a1	0.996
ENSMUSG00000047793	25840.1	35648.3	27276.1	29588.2	Sned1	0.996
ENSMUSG00000053113	30746.1	26277.1	31613.9	29545.7	Socs3	0.996
ENSMUSG00000031320	29270.3	29451.8	28563.5	29095.2	Rps4x	0.996
ENSMUSG00000021939	25853.8	30607.2	30468.8	28976.6	Ctsb	0.996
ENSMUSG00000064373	25668.3	33184.5	27950.6	28934.5	Selenop	0.996
ENSMUSG00000092274	31940.5	23005.2	31019.9	28655.2	Neat1	0.996
ENSMUSG00000038612	30933.8	26623.4	28212.1	28589.7	Mcl1	0.996
ENSMUSG00000025351	24676.4	32516.8	27650.5	28281.2	Cd63	0.996
ENSMUSG00000039630	31567.3	26549.3	26679	28265.2	Hnrnpu	0.996
ENSMUSG00000055065	29722.5	28527.3	26059.9	28103.3	Ddx17	0.995
ENSMUSG00000022565	28018	28825.5	26722.9	27855.5	Plec	0.995
ENSMUSG00000054889	37998.6	17658.2	27876.4	27844.4	Dsp	0.995
ENSMUSG00000016494	20204.7	24940.8	37935.4	27693.6	Cd34	0.995
ENSMUSG00000044533	29312.5	28068.4	25188.8	27523.2	Rps2	0.995
ENSMUSG00000032518	26928	28149.2	25366.6	26814.6	Rpsa	0.995
ENSMUSG00000006800	21670	32333.1	26337.1	26780	Sulf2	0.995
ENSMUSG00000030744	26858.4	27501.7	25813.1	26724.4	Rps3	0.995
ENSMUSG00000003814	23828.8	27114	29178.3	26707.1	Calr	0.995
ENSMUSG00000036853	25692.6	32519.7	21327.9	26513.4	Mcoln3	0.995
ENSMUSG00000048878	23777.2	25974	29702.3	26484.5	Hexim1	0.995
ENSMUSG00000062825	29141.7	24818.6	24628.3	26196.2	Actg1	0.995
ENSMUSG00000025393	26585.4	27778.8	23721.7	26028.6	Atp5b	0.995
ENSMUSG00000023224	13557.3	26720.6	37773.3	26017.1	Serping1	0.995
ENSMUSG00000020372	26413.6	26897.6	24625.2	25978.8	Rack1	0.995
ENSMUSG00000044783	20630.6	30311.9	26796.1	25912.9	A730008H23Rik	0.995
ENSMUSG00000050335	25734.7	27147.7	23753	25545.2	Lgals3	0.995
ENSMUSG00000037242	25481.7	24669.5	25666.7	25272.7	Clic4	0.995
ENSMUSG00000037815	24219.9	26794.6	24622	25212.2	Ctnna1	0.995
ENSMUSG00000024393	26105.8	24866.7	24374.2	25115.6	Prrc2a	0.995
ENSMUSG00000054808	25143.4	25273.7	24761.1	25059.4	Actn4	0.995
ENSMUSG00000028081	24907.2	25290	24201.7	24799.6	Rps3a1	0.995
ENSMUSG00000063511	24462.4	23778.7	25765	24668.7	Snrnp70	0.995
ENSMUSG00000090877	43876.5	14952	14349.7	24392.7	Hspa1b	0.995
ENSMUSG00000042406	22776.8	23233.2	26539.9	24183.3	Atf4	0.995
ENSMUSG00000030208	25930.8	20150.8	26098.6	24060.1	Emp1	0.995
ENSMUSG00000020263	25015.8	22568.4	24419.2	24001.1	Appl2	0.995
ENSMUSG00000031785	22968.7	26855.3	21939.7	23921.2	Adgrg1	0.995
ENSMUSG00000025428	24173.5	25529.6	21858.1	23853.8	Atp5a1	0.995
ENSMUSG00000035202	31730.7	20423.1	18789.9	23647.9	Lars2	0.995
ENSMUSG00000003847	23002.4	25524.8	22284.8	23604	Nfat5	0.995
ENSMUSG00000026042	16678.6	23289.9	30770	23579.5	Col5a2	0.994
ENSMUSG00000015165	23388.2	23043.7	23921.4	23451.1	Hnrnpl	0.994
ENSMUSG00000056201	22656.6	24704.1	22954.1	23438.3	Cfl1	0.994
ENSMUSG00000030772	22048.4	26257.8	21919.8	23408.7	Dkk3	0.994
ENSMUSG00000000078	23805.7	20761.7	25641.6	23403	Klf6	0.994
ENSMUSG00000022893	22395.2	19230.2	28028	23217.8	Adamts1	0.994
ENSMUSG00000034120	24642.6	20099.8	24880.3	23207.6	Srsf2	0.994
ENSMUSG00000031207	22794.7	25322.7	21464.9	23194.1	Msn	0.994
ENSMUSG00000021756	20478.8	25607.5	23439.3	23175.2	Il6st	0.994
ENSMUSG00000008682	22218.1	23761.3	23128.7	23036.1	Rpl10	0.994
ENSMUSG00000024659	23224.8	20641.5	25076.9	22981.1	Anxa1	0.994
ENSMUSG00000029328	23888.9	21892.1	23137.1	22972.7	Hnrnpdl	0.994
ENSMUSG00000021025	20806.6	19963.2	27890	22886.6	Nfkbia	0.994
ENSMUSG00000019820	21950.4	22861.8	22195.9	22336	Utrn	0.994
ENSMUSG00000029135	23299.7	19740	23893.2	22311	Fosl2	0.994
ENSMUSG00000024991	23641.2	22693.5	20261.3	22198.7	Eif3a	0.994
ENSMUSG00000026837	14118.1	22299	29892.6	22103.2	Col5a1	0.994
ENSMUSG00000021546	21736.4	22713.7	21421	21957	Hnrnpk	0.994
ENSMUSG00000022283	23435.7	20613.6	21711.7	21920.3	Pabpc1	0.994
ENSMUSG00000030795	21344.2	21749.7	22439.6	21844.5	Fus	0.994
ENSMUSG00000037876	23788.8	21046.5	20495.5	21776.9	Jmjd1c	0.994
ENSMUSG00000045545	28914	13721.5	22431.2	21688.9	Krt14	0.994
ENSMUSG00000022443	22573.4	21709.3	20741.3	21674.7	Myh9	0.994
ENSMUSG00000007892	22212.8	22732	20027	21657.3	Rplp1	0.994
ENSMUSG00000040225	22905.4	21390.9	20659.7	21652	Prrc2c	0.994
ENSMUSG00000046434	22313	21155.2	21284	21584.1	Hnrnpa1	0.994
ENSMUSG00000025130	19199.1	22161.5	23358.8	21573.1	P4hb	0.994
ENSMUSG00000036446	11860.1	22899.4	29934.4	21564.6	Lum	0.994
ENSMUSG00000035530	21504.5	20503.9	22410.3	21472.9	Eif1	0.994
ENSMUSG00000020585	18014.2	22388.5	23332.6	21245.1	Laptm4a	0.994
ENSMUSG00000032855	20833	21345.7	21526.6	21235.1	Pkd1	0.994
ENSMUSG00000063450	22960.2	19562.1	21172.1	21231.5	Syne2	0.993
ENSMUSG00000029068	22789.5	18593.3	22098.7	21160.5	Ccnl2	0.993
ENSMUSG00000029472	19998.1	20485.6	22684.3	21056	Anapc5	0.993
ENSMUSG00000021282	22087.4	19210.9	21568.5	20955.6	Eif5	0.993
ENSMUSG00000053907	22329.9	17843.9	22569.2	20914.3	Mat2a	0.993
ENSMUSG00000045983	20719.1	21368.8	20650.3	20912.7	Eif4g1	0.993
ENSMUSG00000061048	18567.6	25329.5	18797.2	20898.1	Cdh3	0.993
ENSMUSG00000071172	21394.8	19636.1	21615.5	20882.2	Srsf3	0.993
ENSMUSG00000028820	21715.3	19449.5	20767.4	20644.1	Sfpq	0.993
ENSMUSG00000001472	20868.8	20212.4	20714.1	20598.4	Tcf25	0.993
ENSMUSG00000066036	21203	21177.3	19401.7	20594	Ubr4	0.993
ENSMUSG00000043716	20763.4	20114.3	20688	20521.9	Rpl7	0.993
ENSMUSG00000026473	17832.9	17455.2	25957.5	20415.2	Glul	0.993
ENSMUSG00000003970	20232.1	21413	19592	20412.4	Rpl8	0.993
ENSMUSG00000063870	20965.8	20995.5	19063.9	20341.7	Chd4	0.993
ENSMUSG00000058655	21575.1	20561.6	18740.8	20292.5	Eif4b	0.993
ENSMUSG00000031375	10853.4	21627.5	28365.8	20282.3	Bgn	0.993
ENSMUSG00000017677	20054	18929	21702.3	20228.4	Wsb1	0.993
ENSMUSG00000061904	21360	18387.4	20840.6	20196	Slc25a3	0.993
ENSMUSG00000034088	20043.4	18830.9	21695	20189.8	Hdlbp	0.993
ENSMUSG00000062647	20113	21027.2	19414.2	20184.8	Rpl7a	0.993
ENSMUSG00000032231	20030.8	17816.9	22611.1	20152.9	Anxa2	0.993
ENSMUSG00000022098	18722.6	18848.2	22884	20151.6	Bmp1	0.993
ENSMUSG00000035158	19715.6	20730.9	19691.4	20046	Mitf	0.993
ENSMUSG00000004040	21718.5	18994.5	18865.2	19859.4	Stat3	0.993
ENSMUSG00000028465	19416.2	21275.4	18839.1	19843.6	Tln1	0.993
ENSMUSG00000016921	20906.8	18404.7	20122.2	19811.2	Srsf6	0.993
ENSMUSG00000009079	19536.4	20266.3	19481.2	19761.3	Ewsr1	0.993
ENSMUSG00000029675	15456.9	19901.7	23631.7	19663.4	Eln	0.993
ENSMUSG00000031740	11533.4	20150.8	27252.1	19645.4	Mmp2	0.993
ENSMUSG00000033174	19931.7	21540	17232.8	19568.2	Mgll	0.993
ENSMUSG00000039262	19971.7	20248	18357	19525.6	Prrc2b	0.993
ENSMUSG00000004098	17239.4	17277.2	23932.9	19483.2	Col5a3	0.992
ENSMUSG00000066306	19209.6	19609.2	19323.3	19380.7	Numa1	0.992
ENSMUSG00000022272	19094.7	22183.6	16614.8	19297.7	Myo10	0.992
ENSMUSG00000031538	17822.4	23589.1	16329.3	19246.9	Plat	0.992
ENSMUSG00000034160	22319.3	18343.2	17043.5	19235.3	Ogt	0.992
ENSMUSG00000036545	9902.6	21332.2	26187.5	19140.8	Adamts2	0.992
ENSMUSG00000024740	18864.9	19812.2	18696.9	19124.6	Ddb1	0.992
ENSMUSG00000000957	15408.4	20052.7	21186.8	18882.6	Mmp14	0.992
ENSMUSG00000066842	20336.5	20201.8	16090.9	18876.4	Hmcn1	0.992
ENSMUSG00000053617	21150.3	15488.8	19919.3	18852.8	Sh3pxd2a	0.992
ENSMUSG00000025290	18672	18947.3	18782.6	18800.6	Rps24	0.992
ENSMUSG00000006333	19230.7	18874.2	18272.3	18792.4	Rps9	0.992
ENSMUSG00000059005	19597.5	19239.8	17361.4	18732.9	Hnrnpa3	0.992
ENSMUSG00000023150	20700.2	17303.2	17958.6	18654	Ivns1abp	0.992
ENSMUSG00000020850	17971	20226.8	17488	18561.9	Prpf8	0.992
ENSMUSG00000010095	17491.4	19817	17877	18395.1	Slc3a2	0.992
ENSMUSG00000028517	11954	18311.4	24104.4	18123.3	Plpp3	0.992
ENSMUSG00000024097	17747.5	16376.7	20213.2	18112.5	Srsf7	0.992
ENSMUSG00000055322	16940	16911.6	20321.9	18057.9	Tns1	0.992
ENSMUSG00000029767	16119.9	17733.2	19858.7	17903.9	Calu	0.992
ENSMUSG00000047215	17972	17797.7	17806.9	17858.9	Rpl9	0.992
ENSMUSG00000030103	16710.2	19058.9	17718	17829.1	Bhlhe40	0.992
ENSMUSG00000021268	20518.8	13622.4	19341	17827.4	Meg3	0.992
ENSMUSG00000032440	10647.9	19023.3	23646.4	17772.5	Tgfbr2	0.992
ENSMUSG00000028249	18442.2	19349.4	15493.7	17761.8	Sdcbp	0.992
ENSMUSG00000025809	16848.3	18555.8	17769.3	17724.5	Itgb1	0.992
ENSMUSG00000030655	19222.3	17050.2	16705.8	17659.4	Smg1	0.992
ENSMUSG00000006498	17667.4	17551.4	17521.4	17580.1	Ptbp1	0.992
ENSMUSG00000095041	19629.1	14853.8	18193.9	17558.9	NA	0.992
ENSMUSG00000030536	18471.7	17733.2	16457.9	17554.3	Iqgap1	0.992
ENSMUSG00000078429	17484	17795.8	17266.3	17515.3	Ctdsp2	0.992
ENSMUSG00000024608	17737	17457.1	17084.3	17426.1	Rps14	0.991
ENSMUSG00000026421	17654.7	17180.1	17329	17387.9	Csrp1	0.991
ENSMUSG00000024949	17876.1	17032.9	17002.8	17303.9	Sf1	0.991
ENSMUSG00000000303	19117.9	18892.5	13810.1	17273.5	Cdh1	0.991
ENSMUSG00000066621	17039.1	19693.9	15059.8	17264.2	Tecpr1	0.991
ENSMUSG00000037071	23089.9	11436.7	17239.1	17255.2	Scd1	0.991
ENSMUSG00000036438	16363.4	17188.7	17983.7	17178.6	Calm2	0.991
ENSMUSG00000045962	17313.2	17653.4	16512.3	17159.6	Wnk1	0.991
ENSMUSG00000039220	16495.2	18074.7	16905.5	17158.5	Ppp1r10	0.991
ENSMUSG00000045817	18346.3	15827.4	17244.3	17139.3	Zfp36l2	0.991
ENSMUSG00000030616	16812.5	19490.9	15105.8	17136.4	Sytl2	0.991
ENSMUSG00000041828	16228.5	16066	19114.1	17136.2	Abca8a	0.991
ENSMUSG00000085396	17460.8	16160.3	17774.5	17131.9	Firre	0.991
ENSMUSG00000037447	17066.5	17975.7	16284.3	17108.8	Arid5a	0.991
ENSMUSG00000025085	16722.9	16118.9	18392.5	17078.1	Ablim1	0.991
ENSMUSG00000036478	18732.1	14878.9	17463.9	17025	Btg1	0.991
ENSMUSG00000026923	16992.7	17768.8	16177.7	16979.7	Notch1	0.991
ENSMUSG00000026553	16632.2	16791.4	17455.6	16959.7	Copa	0.991
ENSMUSG00000035569	17398.6	16784.7	16542.6	16908.6	Ankrd11	0.991
ENSMUSG00000031441	17008.6	17326.3	16295.8	16876.9	Atp11a	0.991
ENSMUSG00000035545	18201.8	15503.2	16910.7	16871.9	Leng8	0.991
ENSMUSG00000022032	10700.6	15598.5	24220.5	16839.8	Scara5	0.991
ENSMUSG00000063457	17071.8	17101.2	16339.7	16837.6	Rps15	0.991
ENSMUSG00000023885	9818.26	20088.3	20536.3	16814.3	Thbs2	0.991
ENSMUSG00000052911	14113.9	17559.1	18735.5	16802.8	Lamb2	0.991
ENSMUSG00000010097	16429.8	16209.4	17498.4	16712.5	Nxf1	0.991
ENSMUSG00000026872	16114.6	16266.1	17754.6	16711.8	Zeb2	0.991
ENSMUSG00000031229	17411.2	15943.8	16469.4	16608.2	Atrx	0.991
ENSMUSG00000041453	16322.3	16695.2	16743.4	16587	Rpl21	0.991
ENSMUSG00000027422	14682.1	16517.2	18409.3	16536.2	Rrbp1	0.991
ENSMUSG00000071415	16313.9	16573	16331.4	16406.1	Rpl23	0.991
ENSMUSG00000004044	14647.3	16915.5	17651.1	16404.6	Cavin1	0.99
ENSMUSG00000032525	18517	15086.7	15591	16398.2	Nktr	0.99
ENSMUSG00000032294	16116.8	16980.9	16096.1	16397.9	Pkm	0.99
ENSMUSG00000001119	10349.6	17435	21375	16386.5	Col6a1	0.99
ENSMUSG00000025558	12890	20135.4	15968.5	16331.3	Dock9	0.99
ENSMUSG00000021701	13263.2	20434.6	15240.7	16312.8	Plk2	0.99
ENSMUSG00000053560	15216.5	14826.9	18809.8	16284.4	Ier2	0.99
ENSMUSG00000061983	16484.6	16521.1	15840.9	16282.2	Rps12	0.99
ENSMUSG00000056708	16409.8	15059.7	17261	16243.5	Ier5	0.99
ENSMUSG00000028248	18400	14821.1	15293	16171.4	Pnisr	0.99
ENSMUSG00000031502	12020.4	16117	20298.9	16145.4	Col4a1	0.99
ENSMUSG00000061477	16729.2	16484.5	15085.9	16099.9	Rps7	0.99
ENSMUSG00000000740	16929.5	16427.7	14734.5	16030.6	Rpl13	0.99
ENSMUSG00000018899	16483.6	14822.1	16648.2	15984.6	Irf1	0.99
ENSMUSG00000037573	16397.2	13436.8	17882.2	15905.4	Tob1	0.99
ENSMUSG00000047126	16301.2	16574.9	14746	15874.1	Cltc	0.99
ENSMUSG00000029614	16265.4	15909.2	15297.1	15823.9	Rpl6	0.99
ENSMUSG00000025151	14827.5	16017.9	16592.8	15812.8	Maged1	0.99
ENSMUSG00000018166	16016.6	17021.3	14315.2	15784.4	Erbb3	0.99
ENSMUSG00000022185	15035.2	16111.2	16203.8	15783.4	Acin1	0.99
ENSMUSG00000057113	17131.9	15797.6	14276.5	15735.3	Npm1	0.99
ENSMUSG00000005417	14984.6	15893.8	16295.8	15724.7	Mprip	0.99
ENSMUSG00000030761	15228.1	17778.4	13954.4	15653.7	Myo7a	0.99
ENSMUSG00000029781	11531.2	16469.1	18884	15628.1	Fkbp9	0.99
ENSMUSG00000032580	15927	15323.3	15445.6	15565.3	Rbm5	0.99
ENSMUSG00000021127	16700.7	14550.8	15364.1	15538.5	Zfp36l1	0.99
ENSMUSG00000028809	15743.6	14597.9	16223.7	15521.7	Srrm1	0.99
ENSMUSG00000039952	14896.1	16312.3	15336.9	15515.1	Dag1	0.99
ENSMUSG00000024299	17263.7	13535.9	15328.5	15376	Adamts10	0.99
ENSMUSG00000042644	18001.6	12864.4	15257.4	15374.4	Itpr3	0.99
ENSMUSG00000038014	15757.3	15816.8	14485.6	15353.3	Fam120a	0.99
ENSMUSG00000068036	17352.2	12716.2	15959.1	15342.5	Afdn	0.989
ENSMUSG00000019970	13268.5	15678.3	17061.3	15336	Sgk1	0.989
ENSMUSG00000022122	14583	18009.3	13328	15306.8	Ednrb	0.989
ENSMUSG00000042286	9144.67	24097.1	12652.5	15298.1	Stab1	0.989
ENSMUSG00000016487	13976.8	17285.9	14630	15297.6	Ppfibp1	0.989
ENSMUSG00000031523	15431.6	16048.7	14399.9	15293.4	Dlc1	0.989
ENSMUSG00000028410	19058.9	12467	14290.1	15272	Dnaja1	0.989
ENSMUSG00000061787	15648.7	15192.5	14917.5	15252.9	Rps17	0.989
ENSMUSG00000071984	11619.8	18276.8	15775	15223.9	Fndc1	0.989
ENSMUSG00000047675	15089	15574.4	15005.4	15222.9	Rps8	0.989
ENSMUSG00000031565	15790	12793.2	17026.8	15203.3	Fgfr1	0.989
ENSMUSG00000020044	10911.4	15980.4	18691.6	15194.5	Timp3	0.989
ENSMUSG00000055436	15574.9	14357.4	15650.6	15194.3	Srsf11	0.989
ENSMUSG00000063415	12526.4	15109.7	17661.6	15099.2	Cyp26b1	0.989
ENSMUSG00000009418	16157.9	15446.5	13660.6	15088.3	Nav1	0.989
ENSMUSG00000025358	14980.4	16270.9	14009.8	15087	Cdk2	0.989
ENSMUSG00000020859	15411.5	14567.2	14981.3	14986.7	Spag9	0.989
ENSMUSG00000058558	14977.2	15265.6	14626.8	14956.5	Rpl5	0.989
ENSMUSG00000023067	14977.2	11697.4	18153.1	14942.6	Cdkn1a	0.989
ENSMUSG00000035242	15807.9	14439.2	14477.3	14908.1	Oaz1	0.989
ENSMUSG00000019302	14979.3	16871.2	12864.7	14905.1	Atp6v0a1	0.989
ENSMUSG00000002028	15199.7	14861.5	14262.9	14774.7	Kmt2a	0.989
ENSMUSG00000038900	15066.8	15118.4	14044.3	14743.2	Rpl12	0.989
ENSMUSG00000035258	14349	13597.4	16248.8	14731.7	Abi3bp	0.989
ENSMUSG00000029478	14955.1	14762.5	14291.1	14669.6	Ncor2	0.989
ENSMUSG00000029823	15684.6	13873.5	14443.8	14667.3	Luc7l2	0.989
ENSMUSG00000026074	14537.7	15146.3	14306.8	14663.6	Map4k4	0.989
ENSMUSG00000037563	14780.1	15326.2	13854	14653.4	Rps16	0.989
ENSMUSG00000042254	7676.25	16483.5	19786.5	14648.8	Cilp	0.989
ENSMUSG00000054387	14782.2	14018.8	15017.9	14606.3	Mdm4	0.989
ENSMUSG00000022816	9417.69	14144.8	20143.1	14568.5	Fstl1	0.989
ENSMUSG00000034243	15584.4	13613.8	14498.2	14565.5	Golgb1	0.988
ENSMUSG00000021876	11606.1	14156.4	17888.5	14550.3	Rnase4	0.988
ENSMUSG00000032637	15216.5	13718.6	14708.4	14547.8	Atxn2l	0.988
ENSMUSG00000071866	14549.2	15761	13320.7	14543.7	Ppia	0.988
ENSMUSG00000032198	10002.7	20010.4	13586.3	14533.1	Dock6	0.988
ENSMUSG00000030541	14282.5	16322.9	12953.6	14519.7	Idh2	0.988
ENSMUSG00000027829	15604.4	11445.3	16487.2	14512.3	Ccnl1	0.988
ENSMUSG00000038894	16353.9	12274.6	14836	14488.2	Irs2	0.988
ENSMUSG00000015305	13853.5	14633.5	14962.5	14483.2	Sash1	0.988
ENSMUSG00000048154	14412.2	15144.4	13731.7	14429.4	Kmt2d	0.988
ENSMUSG00000071847	9066.66	15437.8	18732.4	14412.3	Apcdd1	0.988
ENSMUSG00000027712	12073.1	15859.2	15193.6	14375.3	Anxa5	0.988
ENSMUSG00000062328	14415.4	14328.6	14269.2	14337.7	Rpl17	0.988
ENSMUSG00000005198	14861.3	13595.5	14541.1	14332.6	Polr2a	0.988
ENSMUSG00000012848	14823.3	14213.1	13947.1	14327.8	Rps5	0.988
ENSMUSG00000040940	14082.3	14293.9	14461.6	14279.3	Arhgef1	0.988
ENSMUSG00000039953	14631.5	13193.4	14788.9	14204.6	Clstn1	0.988
ENSMUSG00000098973	22490.1	10944.1	9172.22	14202.1	Mir6236	0.988
ENSMUSG00000020423	16689.2	9968.62	15907.9	14188.5	Btg2	0.988
ENSMUSG00000025132	13185.2	15828.4	13338.5	14117.3	Arhgdia	0.988
ENSMUSG00000097971	17960.4	12095.7	12285.4	14113.8	NA	0.988
ENSMUSG00000027309	13454	14803.8	14036	14097.9	4930402H24Rik	0.988
ENSMUSG00000029106	13073.5	14917.3	14283.8	14091.5	Add1	0.988
ENSMUSG00000059070	14163.4	14800.9	13250.6	14071.7	Rpl18	0.988
ENSMUSG00000004872	13505.6	15795.7	12799.9	14033.7	Pax3	0.988
ENSMUSG00000020612	13246.3	15384.9	13244.3	13958.5	Prkar1a	0.988
ENSMUSG00000024164	6893.02	13476.2	21376.1	13915.1	C3	0.988
ENSMUSG00000033004	15094.2	13345.4	13062.4	13834	Mycbp2	0.988
ENSMUSG00000037487	14027.4	14090	13289.3	13802.3	Ubr5	0.988
ENSMUSG00000052512	15032	13990.9	12250.9	13757.9	Nav2	0.988
ENSMUSG00000027763	14176.1	13299.2	13751.5	13742.3	Mbnl1	0.988
ENSMUSG00000018501	13874.6	13950.5	13360.4	13728.5	Ncor1	0.987
ENSMUSG00000050953	12631.8	12125.5	16356.5	13704.6	Gja1	0.987
ENSMUSG00000019432	13115.6	14008.2	13985.8	13703.2	Ddx39b	0.987
ENSMUSG00000020893	13088.2	11331.8	16626.3	13682.1	Per1	0.987
ENSMUSG00000079037	11853.8	11778.2	17312.3	13648.1	Prnp	0.987
ENSMUSG00000048126	9032.93	15693.7	16200.7	13642.4	Col6a3	0.987
ENSMUSG00000051586	13265.3	14404.6	13240.2	13636.7	Mical3	0.987
ENSMUSG00000017707	11623	14192	14934.3	13583.1	Serinc3	0.987
ENSMUSG00000025060	13529.9	13613.8	13497.4	13547	Slk	0.987
ENSMUSG00000025278	13705.9	12403.5	14434.4	13514.6	Flnb	0.987
ENSMUSG00000019846	11561.8	15926.5	12988.1	13492.2	Lama4	0.987
ENSMUSG00000059495	14072.8	13333.8	13016.4	13474.3	Arhgef12	0.987
ENSMUSG00000022096	16565.8	10501.6	13348.9	13472.1	Hr	0.987
ENSMUSG00000024163	13108.2	13289.6	13988.9	13462.2	Mapk8ip3	0.987
ENSMUSG00000059208	13432.9	13899.5	13038.3	13456.9	Hnrnpm	0.987
ENSMUSG00000029004	13434	13459.9	13453.5	13449.1	Kmt2e	0.987
ENSMUSG00000074785	13760.7	15894.8	10610.1	13421.9	Plxnc1	0.987
ENSMUSG00000021950	18414.8	8134.02	13409.6	13319.5	Anxa8	0.987
ENSMUSG00000049775	12095.2	12870.1	14975.1	13313.5	Tmsb4x	0.987
ENSMUSG00000013846	10921.9	14244.9	14637.3	13268	St3gal1	0.987
ENSMUSG00000071659	13278	13226.1	13267.4	13257.1	Hnrnpul2	0.987
ENSMUSG00000023022	13653.2	14138.1	11897.4	13229.6	Lima1	0.987
ENSMUSG00000027248	11443.7	14124.6	14016.1	13194.8	Pdia3	0.987
ENSMUSG00000025369	12617	13582	13316.5	13171.8	Smarcc2	0.987
ENSMUSG00000015243	13945.2	13561.8	11984.2	13163.8	Abca1	0.987
ENSMUSG00000027002	13234.7	14066.9	12176.6	13159.4	Nckap1	0.987
ENSMUSG00000019132	14320.5	11792.6	13338.5	13150.5	BC005537	0.987
ENSMUSG00000032479	12096.3	13549.3	13611.4	13085.7	Map4	0.987
ENSMUSG00000053332	13073.5	12170.7	13994.1	13079.4	Gas5	0.987
ENSMUSG00000040761	13638.5	13284.8	12309.5	13077.6	Spen	0.987
ENSMUSG00000024576	14178.2	12395.8	12605.4	13059.8	Csnk1a1	0.987
ENSMUSG00000072235	10432.8	13556.1	15187.3	13058.7	Tuba1a	0.986
ENSMUSG00000039852	13223.1	13292.5	12464.2	12993.3	Rere	0.986
ENSMUSG00000025203	11812.7	14494	12597	12967.9	Scd2	0.986
ENSMUSG00000039477	13261.1	13045.2	12562.5	12956.3	Tnrc18	0.986
ENSMUSG00000022822	13756.5	12709.5	12346.1	12937.4	Abcc5	0.986
ENSMUSG00000054641	8390.96	18390.3	11981.1	12920.8	Mmrn1	0.986
ENSMUSG00000019817	14310	12783.5	11638.1	12910.5	Plagl1	0.986
ENSMUSG00000024940	12686.6	11708.9	14142.6	12846.1	Ltbp3	0.986
ENSMUSG00000037405	13688	11268.3	13456.6	12804.3	Icam1	0.986
ENSMUSG00000006676	12706.6	12696	12990.2	12797.6	Usp19	0.986
ENSMUSG00000024750	13416	12238.1	12661.9	12772	Zfand5	0.986
ENSMUSG00000014444	11909.7	14186.2	12217.4	12771.1	Piezo1	0.986
ENSMUSG00000049470	13716.5	12206.3	12345	12755.9	Aff4	0.986
ENSMUSG00000057666	11909.7	13625.3	12718.3	12751.1	Gapdh	0.986
ENSMUSG00000016534	12328.2	13054.8	12777.9	12720.3	Lamp2	0.986
ENSMUSG00000031765	12069.9	11162.5	14886.2	12706.2	Mt1	0.986
ENSMUSG00000020241	6975.25	14172.7	16917	12688.3	Col6a2	0.986
ENSMUSG00000026478	10268.4	13422.3	14330.9	12673.9	Lamc1	0.986
ENSMUSG00000022463	12783.6	13964.9	11234.4	12661	Srebf2	0.986
ENSMUSG00000020048	11705.2	12558.4	13606.2	12623.3	Hsp90b1	0.986
ENSMUSG00000028639	12477.9	13015.4	12360.7	12618	Ybx1	0.986
ENSMUSG00000035247	13366.5	12812.4	11649.6	12609.5	Hectd1	0.986
ENSMUSG00000026219	13108.2	12640.2	12078.3	12608.9	Trip12	0.986
ENSMUSG00000029838	15423.1	8698.74	13658.5	12593.4	Ptn	0.986
ENSMUSG00000023010	12457.8	12598.8	12671.3	12576	Tmbim6	0.986
ENSMUSG00000032228	13242.1	12131.3	12306.3	12559.9	Tcf12	0.986
ENSMUSG00000058600	12882.7	12233.3	12446.4	12520.8	Rpl30	0.986
ENSMUSG00000029309	8909.6	13288.6	15359.9	12519.4	Sparcl1	0.986
ENSMUSG00000093674	12107.9	12853.8	12518.6	12493.4	Rpl41	0.986
ENSMUSG00000021477	10040.7	12919.2	14462.6	12474.2	Ctsl	0.986
ENSMUSG00000001175	11597.7	13002.9	12776.9	12459.1	Calm1	0.986
ENSMUSG00000033295	14547.1	9558.8	13251.7	12452.5	Ptprf	0.986
ENSMUSG00000021413	12971.2	11994.7	12296.9	12420.9	Prpf4b	0.985
ENSMUSG00000041417	12301.8	10818.1	13949.2	12356.4	Pik3r1	0.985
ENSMUSG00000024066	12533.7	11212.5	13304	12350.1	Xdh	0.985
ENSMUSG00000036333	12263.9	12616.1	12132.7	12337.6	Kidins220	0.985
ENSMUSG00000037608	12418.8	12607.5	11984.2	12336.8	Bclaf1	0.985
ENSMUSG00000068747	12235.4	14023.6	10750.2	12336.4	Sort1	0.985
ENSMUSG00000008668	12957.5	12469	11580.6	12335.7	Rps18	0.985
ENSMUSG00000001435	10875.6	11487.7	14539	12300.7	Col18a1	0.985
ENSMUSG00000020456	12397.7	13580.1	10917.6	12298.5	Ogdh	0.985
ENSMUSG00000040152	15445.3	8001.26	13362.5	12269.7	Thbs1	0.985
ENSMUSG00000090841	11997.2	12341	12442.3	12260.1	Myl6	0.985
ENSMUSG00000052397	12313.4	11696.4	12747.6	12252.5	Ezr	0.985
ENSMUSG00000036155	13348.6	13561.8	9811.17	12240.5	Mgat5	0.985
ENSMUSG00000035621	13560.5	10361.1	12775.9	12232.5	Midn	0.985
ENSMUSG00000042453	8105.29	17329.2	11257.4	12230.6	Reln	0.985
ENSMUSG00000057841	12652.8	12497.8	11534.6	12228.4	Rpl32	0.985
ENSMUSG00000034707	9817.21	12840.3	14020.3	12225.9	Gns	0.985
ENSMUSG00000038143	12381.9	13510.8	10781.6	12224.8	Stox2	0.985
ENSMUSG00000022708	12556.9	12417	11699.8	12224.6	Zbtb20	0.985
ENSMUSG00000037003	11220.3	12701.8	12735.1	12219	Tns2	0.985
ENSMUSG00000024011	7006.87	12097.6	17543.4	12216	Pi16	0.985
ENSMUSG00000040481	12659.2	12369.9	11511.5	12180.2	Bptf	0.985
ENSMUSG00000022710	12875.3	11900.4	11655.9	12143.8	Usp7	0.985
ENSMUSG00000028495	12191.1	12482.4	11756.3	12143.3	Rps6	0.985
ENSMUSG00000024073	12989.1	11836.9	11585.8	12137.3	Birc6	0.985
ENSMUSG00000031425	12111	12204.4	12064.7	12126.7	Plp1	0.985
ENSMUSG00000032562	10701.6	13422.3	12222.7	12115.5	Gnai2	0.985
ENSMUSG00000030451	12010.9	12620	11684.1	12105	Herc2	0.985
ENSMUSG00000031714	12231.2	12815.3	11181.1	12075.9	Gab1	0.985
ENSMUSG00000048271	12587.5	11684.9	11939.3	12070.5	Rbm33	0.985
ENSMUSG00000035557	17221.5	6732.33	12256.1	12070	Krt17	0.985
ENSMUSG00000021279	11460.6	13310.7	11437.3	12069.6	Cdc42bpb	0.984
ENSMUSG00000003226	12510.5	12107.2	11565.9	12061.2	Ranbp2	0.984
ENSMUSG00000020849	12223.8	12311.2	11555.5	12030.2	Ywhae	0.984
ENSMUSG00000060261	11945.5	12676.8	11391.3	12004.5	Gtf2i	0.984
ENSMUSG00000030779	13059.7	11387.6	11513.6	11987	Rbbp6	0.984
ENSMUSG00000025223	12782.5	11255.8	11913.1	11983.8	Ldb1	0.984
ENSMUSG00000020758	12959.6	9918.6	13053	11977.1	Itgb4	0.984
ENSMUSG00000013236	13430.8	9782.95	12665	11959.6	Ptprs	0.984
ENSMUSG00000026604	11702	12152.4	11973.8	11942.7	Ptpn14	0.984
ENSMUSG00000020953	3020.11	17649.5	15157	11942.2	Coch	0.984
ENSMUSG00000043962	11962.4	11817.7	12025	11935	Thrap3	0.984
ENSMUSG00000091971	21291.5	6625.55	7881.77	11932.9	Hspa1a	0.984
ENSMUSG00000008348	11125.4	11247.2	13357.3	11910	Ubc	0.984
ENSMUSG00000006205	7897.62	11795.5	16034.4	11909.2	Htra1	0.984
ENSMUSG00000021559	11047.4	10292.8	14381.1	11907.1	Dapk1	0.984
ENSMUSG00000007880	12489.5	12045.7	11119.4	11884.8	Arid1a	0.984
ENSMUSG00000028917	11049.5	12573.8	11911	11844.8	Plekhm2	0.984
ENSMUSG00000021495	11796.9	10908.5	12767.5	11824.3	Fam193b	0.984
ENSMUSG00000030057	11518.6	12409.3	11489.6	11805.8	Cnbp	0.984
ENSMUSG00000035325	11134.9	11963.9	12256.1	11785	Sec31a	0.984
ENSMUSG00000020863	12785.7	11504	11046.2	11778.6	Luc7l3	0.984
ENSMUSG00000008683	11978.2	11807.1	11473.9	11753.1	Rps15a	0.984
ENSMUSG00000021709	12364	11477.1	11386.1	11742.4	Erbin	0.984
ENSMUSG00000027894	11531.2	12721	10958.4	11736.9	Slc6a17	0.984
ENSMUSG00000040952	11964.5	11753.2	11469.7	11729.1	Rps19	0.984
ENSMUSG00000021819	11295.1	12418	11456.1	11723.1	Zswim8	0.984
ENSMUSG00000032515	12297.6	10032.1	12822.9	11717.5	Csrnp1	0.984
ENSMUSG00000078812	12100.5	12169.8	10860.1	11710.1	Eif5a	0.984
ENSMUSG00000001924	11270.9	12382.4	11434.2	11695.8	Uba1	0.984
ENSMUSG00000022139	11683	11862.9	11536.6	11694.2	Mbnl2	0.984
ENSMUSG00000034908	11725.2	11110.6	12232.1	11689.3	Sidt2	0.984
ENSMUSG00000079523	9873.08	12207.3	12784.2	11621.5	Tmsb10	0.983
ENSMUSG00000038056	11749.4	11686.8	11418.5	11618.2	Kmt2c	0.983
ENSMUSG00000078578	12026.7	11318.4	11502.1	11615.7	Ube2d3	0.983
ENSMUSG00000057530	9157.32	12627.7	12855.3	11546.8	Ece1	0.983
ENSMUSG00000036371	11986.6	11874.4	10775.3	11545.5	Serbp1	0.983
ENSMUSG00000005087	12691.9	12334.3	9605.16	11543.8	Cd44	0.983
ENSMUSG00000071644	12079.4	11799.4	10709.5	11529.4	Eef1g	0.983
ENSMUSG00000024392	11149.6	11781.1	11591	11507.3	Bag6	0.983
ENSMUSG00000007817	11924.4	11393.4	11157	11491.6	Zmiz1	0.983
ENSMUSG00000015850	10989.4	11808	11652.7	11483.4	Adamtsl4	0.983
ENSMUSG00000001248	10775.4	12872.1	10801.5	11483	Gramd1a	0.983
ENSMUSG00000041328	12228	11032.6	11149.7	11470.1	Pcf11	0.983
ENSMUSG00000015354	8092.64	12037	14216.9	11448.8	Pcolce2	0.983
ENSMUSG00000025794	11469	11570.4	11283.6	11441	Rpl14	0.983
ENSMUSG00000045482	11341.5	11380.9	11516.8	11413.1	Trrap	0.983
ENSMUSG00000032035	10871.4	14203.5	9110.52	11395.1	Ets1	0.983
ENSMUSG00000031447	10124	11886	12116	11375.3	Lamp1	0.983
ENSMUSG00000024483	11673.6	11258.7	11192.6	11375	Ankhd1	0.983
ENSMUSG00000015312	10764.9	11690.7	11655.9	11370.5	Gadd45b	0.983
ENSMUSG00000025967	11543.9	11194.3	11345.3	11361.1	Eef1b2	0.983
ENSMUSG00000021488	11812.7	11098.1	11165.4	11358.7	Nsd1	0.983
ENSMUSG00000001025	11494.3	9468.36	13104.2	11355.6	S100a6	0.983
ENSMUSG00000053470	12390.4	10973	10654	11339.1	Kdm3a	0.983
ENSMUSG00000025650	10820.8	9980.17	13171.1	11324	Col7a1	0.983
ENSMUSG00000019978	9918.41	12758.5	11212.5	11296.5	Epb41l2	0.983
ENSMUSG00000030432	11265.6	11527.1	11092.2	11295	Rpl28	0.983
ENSMUSG00000062078	11206.6	11541.6	11136.1	11294.7	Qk	0.983
ENSMUSG00000025153	12853.1	10321.7	10621.6	11265.5	Fasn	0.983
ENSMUSG00000024948	8675.58	14815.4	10281.8	11257.6	Map4k2	0.983
ENSMUSG00000028692	10328.5	12679.6	10718.9	11242.3	Akr1a1	0.983
ENSMUSG00000009927	11477.5	11442.5	10787.9	11235.9	Rps25	0.983
ENSMUSG00000048546	10981	11450.2	11082.8	11171.3	Tob2	0.982
ENSMUSG00000057133	11621.9	11367.4	10485.7	11158.3	Chd6	0.982
ENSMUSG00000001525	10856.6	11998.5	10576.7	11143.9	Tubb5	0.982
ENSMUSG00000033863	10783.9	9459.71	13067.6	11103.7	Klf9	0.982
ENSMUSG00000053477	10046	12160.1	11073.4	11093.2	Tcf4	0.982
ENSMUSG00000045128	10907.2	11503.1	10856.9	11089.1	Rpl18a	0.982
ENSMUSG00000020198	11031.6	11166.4	11014.8	11070.9	Ap3d1	0.982
ENSMUSG00000039001	10878.7	11567.5	10737.7	11061.3	Rps21	0.982
ENSMUSG00000048537	10779.6	10710.4	11692.5	11060.8	Phldb1	0.982
ENSMUSG00000020994	10953.6	11936	10239.9	11043.2	Pnn	0.982
ENSMUSG00000034220	10520.3	13877.4	8726.73	11041.5	Gpc1	0.982
ENSMUSG00000018398	10622.6	11552.1	10893.5	11022.7	2018-09-08	0.982
ENSMUSG00000018476	11986.6	9655	11335.9	10992.5	Kdm6b	0.982
ENSMUSG00000005483	13598.4	8538.08	10790	10975.5	Dnajb1	0.982
ENSMUSG00000031812	11045.3	10555.5	11323.3	10974.7	Map1lc3b	0.982
ENSMUSG00000029817	12431.5	9215.35	11276.3	10974.4	Tra2a	0.982
ENSMUSG00000017009	12814.1	7143.12	12946.3	10967.9	Sdc4	0.982
ENSMUSG00000010608	10899.8	11225	10742.9	10955.9	Rbm25	0.982
ENSMUSG00000029096	7076.45	10820	14970.9	10955.8	Htra3	0.982
ENSMUSG00000070047	12847.9	9214.39	10778.5	10946.9	Fat1	0.982
ENSMUSG00000035356	11576.6	8068.6	13186.8	10944	Nfkbiz	0.982
ENSMUSG00000075590	11420.6	9309.63	12091.9	10940.7	Nrbp2	0.982
ENSMUSG00000028339	6396.52	11455	14924.9	10925.5	Col15a1	0.982
ENSMUSG00000039361	10755.4	11100	10874.7	10910	Picalm	0.982
ENSMUSG00000068823	10833.4	10670.9	11203.1	10902.5	Csde1	0.982
ENSMUSG00000029169	11108.5	11242.4	10346.6	10899.2	Dhx15	0.982
ENSMUSG00000004651	11744.2	13325.2	7603.6	10891	Tyr	0.982
ENSMUSG00000064080	6399.69	11275.1	14957.3	10877.3	Fbln2	0.982
ENSMUSG00000028053	11445.9	10482.4	10648.8	10859	Ash1l	0.982
ENSMUSG00000026547	11571.3	10259.2	10745	10858.5	Tagln2	0.982
ENSMUSG00000031835	9796.13	11157.7	11615.1	10856.3	Mbtps1	0.982
ENSMUSG00000050565	11513.3	10475.6	10579.8	10856.2	Tor1aip2	0.981
ENSMUSG00000022141	11292	10591.1	10664.5	10849.2	Nipbl	0.981
ENSMUSG00000005442	11110.6	10786.4	10607	10834.7	Cic	0.981
ENSMUSG00000048076	9850.94	11231.8	11359.9	10814.2	Arf1	0.981
ENSMUSG00000027940	10537.2	10685.3	11145.5	10789.4	Tpm3	0.981
ENSMUSG00000031311	11091.7	11066.3	10198.1	10785.4	Nono	0.981
ENSMUSG00000042699	11513.3	10995.1	9804.9	10771.1	Dhx9	0.981
ENSMUSG00000003660	10413.9	11626.2	10248.3	10762.8	Snrnp200	0.981
ENSMUSG00000010277	10406.5	10588.2	11165.4	10720	2610507B11Rik	0.981
ENSMUSG00000071054	11229.8	10441.9	10457.4	10709.7	Safb	0.981
ENSMUSG00000031422	11579.7	9095.09	11439.4	10704.7	Morf4l2	0.981
ENSMUSG00000027800	10149.3	12533.4	9423.2	10702	Tm4sf1	0.981
ENSMUSG00000005566	11319.4	10498.7	10283.8	10700.6	Trim28	0.981
ENSMUSG00000015647	11410	8758.38	11927.8	10698.7	Lama5	0.981
ENSMUSG00000021508	14068.6	7064.23	10897.7	10676.8	Cxcl14	0.981
ENSMUSG00000007872	10259.9	10859.5	10885.1	10668.2	Id3	0.981
ENSMUSG00000021794	9818.26	11196.2	10923.8	10646.1	Glud1	0.981
ENSMUSG00000027184	11024.2	11108.6	9771.43	10634.8	Caprin1	0.981
ENSMUSG00000006005	10632.1	11104.8	10137.4	10624.8	Tpr	0.981
ENSMUSG00000031386	10651	11331.8	9857.18	10613.3	Hcfc1	0.981
ENSMUSG00000030002	10806	9911.86	11115.2	10611	Dusp11	0.981
ENSMUSG00000036529	10031.2	11050.9	10709.5	10597.2	Sbf1	0.981
ENSMUSG00000019877	9292.25	11336.6	11100.6	10576.5	Serinc1	0.981
ENSMUSG00000036591	10696.4	10658.4	10327.8	10560.8	Arhgap21	0.981
ENSMUSG00000054364	8856.89	10129.3	12639.9	10542	Rhob	0.981
ENSMUSG00000019818	9797.18	10380.4	11430	10535.8	Cd164	0.981
ENSMUSG00000029505	10988.4	10726.7	9888.55	10534.5	Ep400	0.981
ENSMUSG00000031865	10055.4	11069.2	10476.3	10533.6	Dctn1	0.981
ENSMUSG00000005103	11505.9	10135.1	9901.1	10514	Wdr1	0.981
ENSMUSG00000020190	11724.2	8724.71	11077.6	10508.8	Mknk2	0.981
ENSMUSG00000021091	6590.49	10316.9	14570.4	10492.6	Serpina3n	0.981
ENSMUSG00000040128	11445.9	9800.27	10200.2	10482.1	Pnrc1	0.98
ENSMUSG00000033006	9716.01	11661.8	10061.1	10479.6	Sox10	0.98
ENSMUSG00000020357	6068.69	16510.5	8835.49	10471.6	Flt4	0.98
ENSMUSG00000031503	8230.73	10430.4	12720.4	10460.5	Col4a2	0.98
ENSMUSG00000029050	10550.9	9964.78	10796.3	10437.3	Ski	0.98
ENSMUSG00000027342	10669	10137	10468.9	10425	Pcna	0.98
ENSMUSG00000037364	10504.5	10600.7	10160.4	10421.9	Srrt	0.98
ENSMUSG00000003435	10031.2	10868.1	10356	10418.4	Supt5	0.98
ENSMUSG00000041560	10689	10500.6	10056.9	10415.5	Nop53	0.98
ENSMUSG00000040462	9087.75	11464.6	10683.3	10411.9	Os9	0.98
ENSMUSG00000028556	10803.9	10766.2	9631.3	10400.4	Dock7	0.98
ENSMUSG00000022419	10378	9267.3	11521	10388.8	Deptor	0.98
ENSMUSG00000070327	10618.4	10545.8	9965.94	10376.7	Rnf213	0.98
ENSMUSG00000032013	13879.9	6936.28	10196	10337.4	Trim29	0.98
ENSMUSG00000063229	10797.6	10738.3	9382.41	10306.1	Ldha	0.98
ENSMUSG00000031799	10180.9	10590.1	10139.5	10303.5	Tpm4	0.98
ENSMUSG00000021540	10563.5	11052.8	9284.11	10300.2	Smad5	0.98
ENSMUSG00000022836	9274.33	12113	9465.03	10284.1	Mylk	0.98
ENSMUSG00000023830	9954.25	10894.1	9981.63	10276.7	Igf2r	0.98
ENSMUSG00000031540	10867.1	10277.4	9681.5	10275.4	Kat6a	0.98
ENSMUSG00000031167	10674.2	10087.9	10041.2	10267.8	Rbm3	0.98
ENSMUSG00000035851	11321.5	9410.64	10065.3	10265.8	Ythdc1	0.98
ENSMUSG00000028530	10028	10478.5	10274.4	10260.3	Jak1	0.98
ENSMUSG00000018143	11779	8886.33	10112.3	10259.2	Mafk	0.98
ENSMUSG00000044042	12048.8	10209.1	8508.17	10255.4	Fmn1	0.98
ENSMUSG00000001440	10916.7	10208.2	9633.39	10252.7	Kpnb1	0.98
ENSMUSG00000025784	7072.23	9616.52	14034.9	10241.2	Clec3b	0.98
ENSMUSG00000040731	10343.2	10392.9	9977.44	10237.9	Eif4h	0.98
ENSMUSG00000028759	10235.7	10171.6	10287	10231.4	Hp1bp3	0.98
ENSMUSG00000030342	9901.54	10186	10591.3	10226.3	Cd9	0.98
ENSMUSG00000007655	8923.3	9890.7	11847.2	10220.4	Cav1	0.98
ENSMUSG00000018001	9172.08	11498.3	9986.85	10219.1	Cyth3	0.98
ENSMUSG00000027189	10325.3	10559.3	9760.97	10215.2	Trim44	0.979
ENSMUSG00000035901	9713.9	10361.1	10520.2	10198.4	Dennd5a	0.979
ENSMUSG00000037965	10512.9	9615.56	10451.2	10193.2	Zc3h7a	0.979
ENSMUSG00000040459	10973.6	10040.8	9519.41	10177.9	Arglu1	0.979
ENSMUSG00000002052	9976.39	10449.6	10102.9	10176.3	Supt6	0.979
ENSMUSG00000001729	9725.5	11513.7	9275.75	10171.6	Akt1	0.979
ENSMUSG00000079487	9880.46	10399.6	10228.4	10169.5	Med12	0.979
ENSMUSG00000037138	8738.82	10549.7	11174.8	10154.4	Aff3	0.979
ENSMUSG00000070733	10217.8	10143.7	10077.8	10146.4	Fryl	0.979
ENSMUSG00000034993	9932.11	10791.2	9700.32	10141.2	Vat1	0.979
ENSMUSG00000000346	9634.84	10956.6	9818.49	10136.7	Dazap2	0.979
ENSMUSG00000024853	9841.46	10668	9881.23	10130.2	Sf3b2	0.979
ENSMUSG00000030934	9966.9	9734.85	10605.9	10102.6	Oat	0.979
ENSMUSG00000032097	10222	10372.7	9658.49	10084.4	Ddx6	0.979
ENSMUSG00000024359	10434.9	10336.1	9436.79	10069.3	Hspa9	0.979
ENSMUSG00000036550	10445.5	10223.6	9497.45	10055.5	Cnot1	0.979
ENSMUSG00000038733	10832.3	9798.34	9485.94	10038.9	Wdr26	0.979
ENSMUSG00000041459	10939.9	9497.23	9661.63	10032.9	Tardbp	0.979
ENSMUSG00000032193	9538.92	12510.3	8039.68	10029.6	Ldlr	0.979
ENSMUSG00000022548	8000.93	10036	11945.5	9994.14	Apod	0.979
ENSMUSG00000018379	10833.4	9372.16	9759.93	9988.5	Srsf1	0.979
ENSMUSG00000008200	10506.6	9598.24	9816.4	9973.75	Fnbp4	0.979
ENSMUSG00000018042	8928.57	11168.3	9768.29	9955.05	Cyb5r3	0.979
ENSMUSG00000023004	8744.1	10795	10318.4	9952.49	Tuba1b	0.979
ENSMUSG00000001687	9755.02	11263.5	8834.44	9951	Ubl3	0.979
ENSMUSG00000020460	9903.65	9793.53	10141.6	9946.27	Rps27a	0.979
ENSMUSG00000020368	9550.51	10625.7	9616.66	9930.96	Canx	0.979
ENSMUSG00000038886	9818.26	10438.1	9523.59	9926.65	Man2a2	0.979
ENSMUSG00000039831	8300.3	11712.8	9750.52	9921.2	Arhgap29	0.979
ENSMUSG00000061306	8226.51	10832.5	10696.9	9918.65	Slc38a10	0.979
ENSMUSG00000038615	10022.8	9902.24	9749.47	9891.49	Nfe2l1	0.979
ENSMUSG00000033705	10662.6	9174.94	9836.27	9891.28	Stard9	0.978
ENSMUSG00000042436	6419.72	10963.4	12286.4	9889.84	Mfap4	0.978
ENSMUSG00000027365	10492.9	9907.05	9230.78	9876.92	Trpm7	0.978
ENSMUSG00000066551	9716.01	9701.18	10203.3	9873.5	Hmgb1	0.978
ENSMUSG00000031537	10150.3	9732.92	9726.46	9869.9	Ikbkb	0.978
ENSMUSG00000039473	10230.4	10188.9	9175.36	9864.91	Ubn1	0.978
ENSMUSG00000041740	10014.3	9717.53	9851.95	9861.27	Rnf10	0.978
ENSMUSG00000024045	9498.86	10064.8	9940.84	9834.84	Akap8	0.978
ENSMUSG00000002602	8161.16	8602.53	12739.3	9834.31	Axl	0.978
ENSMUSG00000064210	9565.27	9848.37	10086.2	9833.28	Ano6	0.978
ENSMUSG00000024048	9663.31	10239.9	9585.29	9829.5	Myl12a	0.978
ENSMUSG00000017631	10035.4	9574.19	9876.01	9828.54	Abr	0.978
ENSMUSG00000040463	9944.76	10569.9	8963.07	9825.91	Mybbp1a	0.978
ENSMUSG00000029467	10217.8	9627.1	9568.56	9804.48	Atp2a2	0.978
ENSMUSG00000028005	8696.66	12703.7	7960.2	9786.85	Gucy1b1	0.978
ENSMUSG00000052707	10290.5	9239.4	9828.95	9786.29	Tnrc6a	0.978
ENSMUSG00000005125	8583.87	9765.63	10996	9781.83	Ndrg1	0.978
ENSMUSG00000037805	10235.7	9974.4	9105.29	9771.8	Rpl10a	0.978
ENSMUSG00000020458	9834.08	9881.08	9567.51	9760.89	Rtn4	0.978
ENSMUSG00000020889	10716.4	10803.7	7736.41	9752.16	Nr1d1	0.978
ENSMUSG00000041133	9693.88	9844.52	9712.87	9750.42	Smc1a	0.978
ENSMUSG00000038664	10185.1	9925.33	9136.66	9749.03	Herc1	0.978
ENSMUSG00000021156	9411.37	9889.74	9897.97	9733.02	Zmynd11	0.978
ENSMUSG00000036606	9521	9890.7	9779.8	9730.5	Plxnb2	0.978
ENSMUSG00000029064	9388.18	10095.6	9699.28	9727.69	Gnb1	0.978
ENSMUSG00000029455	9389.23	9889.74	9845.68	9708.22	Aldh2	0.978
ENSMUSG00000015291	9424.02	9213.42	10484.6	9707.36	Gdi1	0.978
ENSMUSG00000049517	9473.56	9875.31	9750.52	9699.79	Rps23	0.978
ENSMUSG00000030231	9639.06	9420.26	10036	9698.44	Plekha5	0.978
ENSMUSG00000007815	9004.47	10124.5	9934.57	9687.84	Rhoa	0.978
ENSMUSG00000040010	10140.8	10961.4	7924.65	9675.64	Slc7a5	0.978
ENSMUSG00000036752	9385.01	8691.04	10943.7	9673.25	Tubb4b	0.977
ENSMUSG00000024042	11315.1	7298.97	10398.9	9671	Sik1	0.977
ENSMUSG00000022263	9523.11	10116.8	9341.63	9660.5	Trio	0.977
ENSMUSG00000071650	9176.29	10010	9786.07	9657.45	Ganab	0.977
ENSMUSG00000001017	9858.32	9728.11	9335.36	9640.6	Chtop	0.977
ENSMUSG00000018217	8184.35	9279.81	11413.2	9625.8	Pmp22	0.977
ENSMUSG00000025508	9590.57	9884.93	9376.14	9617.21	Rplp2	0.977
ENSMUSG00000003316	9219.51	9622.29	10003.6	9615.13	Glg1	0.977
ENSMUSG00000019087	8677.68	10491	9648.03	9605.58	Atp6ap1	0.977
ENSMUSG00000006699	9036.09	9914.75	9857.18	9602.67	Cdc42	0.977
ENSMUSG00000032011	5335	11346.3	12112.9	9598.04	Thy1	0.977
ENSMUSG00000002748	9719.18	9602.09	9433.66	9584.97	Baz1b	0.977
ENSMUSG00000020594	9980.6	9365.43	9369.87	9571.96	Pum2	0.977
ENSMUSG00000059291	9905.76	9501.07	9291.43	9566.09	Rpl11	0.977
ENSMUSG00000017774	9085.64	9821.43	9788.16	9565.08	Myo1c	0.977
ENSMUSG00000011179	10042.8	8791.09	9821.63	9551.84	Odc1	0.977
ENSMUSG00000061315	9835.13	9577.07	9203.59	9538.6	Naca	0.977
ENSMUSG00000001627	10946.2	6991.12	10659.3	9532.19	Ifrd1	0.977
ENSMUSG00000037852	9733.93	8169.62	10683.3	9528.96	Cpe	0.977
ENSMUSG00000026103	9109.88	9826.24	9615.62	9517.25	Gls	0.977
ENSMUSG00000025927	9922.62	10241.8	8356.54	9507	Tfap2b	0.977
ENSMUSG00000065954	9337.58	10866.2	8312.62	9505.47	Tacc1	0.977
ENSMUSG00000028760	8915.92	9990.75	9589.47	9498.71	Eif4g3	0.977
ENSMUSG00000059981	8633.41	10499.7	9331.17	9488.08	Taok2	0.977
ENSMUSG00000034269	9516.78	9344.26	9561.24	9474.09	Setd5	0.977
ENSMUSG00000027881	9386.07	9719.46	9297.71	9467.74	Prpf38b	0.977
ENSMUSG00000037270	9965.84	9547.25	8872.09	9461.73	4932438A13Rik	0.977
ENSMUSG00000024413	9362.88	9587.66	9374.05	9441.53	Npc1	0.977
ENSMUSG00000020917	10022.8	9998.45	8291.7	9437.64	Acly	0.977
ENSMUSG00000003541	9110.94	9542.44	9645.94	9433.11	Ier3	0.977
ENSMUSG00000026276	9107.77	9602.09	9588.43	9432.76	2018-09-02	0.977
ENSMUSG00000035929	9821.43	7897.36	10523.3	9414.04	H2-Q4	0.976
ENSMUSG00000040407	10408.6	9024.87	8776.93	9403.46	Akap9	0.976
ENSMUSG00000021877	8929.62	8641.01	10634.2	9401.6	Arf4	0.976
ENSMUSG00000027312	9020.28	10236.1	8916.01	9390.79	Atrn	0.976
ENSMUSG00000046364	9252.19	9568.42	9340.58	9387.06	Rpl27a	0.976
ENSMUSG00000039457	9992.2	7986.83	10055.9	9344.97	Ppl	0.976
ENSMUSG00000031075	8459.48	11044.2	8447.52	9317.06	Ano1	0.976
ENSMUSG00000029422	9171.02	9195.15	9558.1	9308.09	Rsrc2	0.976
ENSMUSG00000026991	8301.36	10315	9297.71	9304.67	Pkp4	0.976
ENSMUSG00000028691	9218.46	9830.09	8781.11	9276.55	Prdx1	0.976
ENSMUSG00000013787	9424.02	9378.9	9024.77	9275.89	Ehmt2	0.976
ENSMUSG00000026656	8409.93	8912.31	10434.4	9252.22	Fcgr2b	0.976
ENSMUSG00000028514	9348.12	9580.92	8817.71	9248.92	Usp24	0.976
ENSMUSG00000043411	9413.47	8764.15	9543.46	9240.36	Usp48	0.976
ENSMUSG00000028234	9153.1	9233.63	9301.89	9229.54	Rps20	0.976
ENSMUSG00000020745	9631.68	8997.93	9051.96	9227.19	Pafah1b1	0.976
ENSMUSG00000040711	9290.14	8596.76	9785.03	9223.98	Sh3pxd2b	0.976
ENSMUSG00000047036	9300.68	9357.73	8972.48	9210.3	Zfp445	0.976
ENSMUSG00000031729	9879.4	8481.31	9268.43	9209.72	Ist1	0.976
ENSMUSG00000033228	9011.85	9950.34	8617.98	9193.39	Scaf11	0.976
ENSMUSG00000037072	8342.47	10395.8	8828.17	9188.8	Selenof	0.976
ENSMUSG00000025162	9707.58	8884.41	8939.02	9177	Csnk1d	0.976
ENSMUSG00000019960	9837.24	9504.92	8178.76	9173.64	Dusp6	0.976
ENSMUSG00000007564	8883.24	10020.6	8611.7	9171.84	Ppp2r1a	0.976
ENSMUSG00000066406	9003.41	9380.82	9115.75	9166.66	Akap13	0.976
ENSMUSG00000030847	10052.3	8183.08	9201.5	9145.62	Bag3	0.976
ENSMUSG00000034810	8555.4	7327.83	11548.2	9143.8	Scn7a	0.976
ENSMUSG00000006307	8865.32	9407.76	9126.21	9133.1	Kmt2b	0.976
ENSMUSG00000023977	9322.82	9107.6	8960.98	9130.47	Ubr2	0.976
ENSMUSG00000032280	9341.79	8939.24	9088.56	9123.2	Tle3	0.976
ENSMUSG00000059263	9337.58	8889.22	9125.16	9117.32	Usp47	0.976
ENSMUSG00000021288	8710.36	9642.49	8985.03	9112.63	Klc1	0.975
ENSMUSG00000030523	8896.95	11311.6	7123.61	9110.73	Trpm1	0.975
ENSMUSG00000048960	8843.18	10144.7	8341.9	9109.92	Prex2	0.975
ENSMUSG00000013275	9659.09	8650.63	8993.4	9101.04	Slc41a1	0.975
ENSMUSG00000029718	5754.55	9676.16	11852.5	9094.39	Pcolce	0.975
ENSMUSG00000040415	9463.02	8456.3	9330.13	9083.15	Dtx3	0.975
ENSMUSG00000040785	9527.32	9458.74	8214.32	9066.79	Ttc3	0.975
ENSMUSG00000029622	8358.28	9484.72	9353.13	9065.38	Arpc1b	0.975
ENSMUSG00000028936	9195.27	8903.65	9028.95	9042.62	Rpl22	0.975
ENSMUSG00000031078	8571.22	9141.27	9413.79	9042.09	Cttn	0.975
ENSMUSG00000028214	10497.1	7791.53	8822.94	9037.2	Gem	0.975
ENSMUSG00000030695	8902.22	9218.24	8960.98	9027.14	Aldoa	0.975
ENSMUSG00000002812	8738.82	9239.4	9100.06	9026.1	Flii	0.975
ENSMUSG00000030824	7854.4	9858.95	9364.64	9026	Nucb1	0.975
ENSMUSG00000016319	9262.73	9385.63	8415.1	9021.15	Slc25a5	0.975
ENSMUSG00000031633	8581.76	10550.7	7920.46	9017.63	Slc25a4	0.975
ENSMUSG00000060373	9231.11	8815.14	8989.21	9011.82	Hnrnpc	0.975
ENSMUSG00000032187	8758.85	9793.53	8443.34	8998.57	Smarca4	0.975
ENSMUSG00000059248	8910.65	9752.17	8306.34	8989.72	2018-09-09	0.975
ENSMUSG00000044791	9468.29	8804.56	8679.67	8984.17	Setd2	0.975
ENSMUSG00000057751	8182.24	9625.18	9092.74	8966.72	Megf6	0.975
ENSMUSG00000030435	8819.99	9081.63	8991.31	8964.31	U2af2	0.975
ENSMUSG00000000278	7959.81	9519.35	9400.19	8959.79	Scpep1	0.975
ENSMUSG00000024431	9249.03	8767.04	8858.5	8958.19	Nr3c1	0.975
ENSMUSG00000042625	9410.31	8347.59	9095.88	8951.26	Safb2	0.975
ENSMUSG00000026571	9223.73	8875.75	8745.56	8948.35	Dcaf6	0.975
ENSMUSG00000024812	8648.17	10434.2	7753.15	8945.19	Tjp2	0.975
ENSMUSG00000019851	12508.4	5277.73	9032.09	8939.42	Perp	0.975
ENSMUSG00000033943	9396.61	8732.41	8686.99	8938.67	Mga	0.975
ENSMUSG00000000753	4900.7	9417.38	12495.6	8937.89	Serpinf1	0.975
ENSMUSG00000031453	8146.4	10240.9	8423.47	8936.92	Rasa3	0.975
ENSMUSG00000026842	8530.1	9404.87	8836.54	8923.84	Abl1	0.974
ENSMUSG00000013076	8630.25	9399.1	8714.18	8914.51	Amotl1	0.974
ENSMUSG00000032340	8712.47	9255.75	8767.52	8911.91	Neo1	0.974
ENSMUSG00000021577	8510.08	9851.26	8374.32	8911.88	Sdha	0.974
ENSMUSG00000026341	9113.04	8938.28	8676.54	8909.29	Actr3	0.974
ENSMUSG00000026463	8968.63	8697.77	8999.67	8888.69	Atp2b4	0.974
ENSMUSG00000042520	8787.32	9127.8	8750.79	8888.63	Ubap2l	0.974
ENSMUSG00000030738	8709.31	9533.78	8391.05	8878.05	Eif3c	0.974
ENSMUSG00000025026	7560.3	9178.79	9886.46	8875.18	Add3	0.974
ENSMUSG00000029726	8782.04	8767.04	9051.96	8867.01	Mepce	0.974
ENSMUSG00000061410	8650.28	9147.04	8802.03	8866.45	Zcchc14	0.974
ENSMUSG00000053580	8010.41	9376.97	9170.13	8852.5	Tanc2	0.974
ENSMUSG00000060636	8791.53	8636.2	9092.74	8840.16	Rpl35a	0.974
ENSMUSG00000022285	9463.02	8169.62	8875.23	8835.95	Ywhaz	0.974
ENSMUSG00000027447	7550.81	9711.76	9242.29	8834.95	Cst3	0.974
ENSMUSG00000004535	9425.07	8259.08	8757.06	8813.74	Tax1bp1	0.974
ENSMUSG00000055024	9159.43	8846.89	8388.96	8798.42	Ep300	0.974
ENSMUSG00000018076	8964.41	8489.97	8929.61	8794.66	Med13l	0.974
ENSMUSG00000097767	11614.5	6437.95	8314.71	8789.06	Miat	0.974
ENSMUSG00000026586	9033.98	8192.7	9134.57	8787.09	Prrx1	0.974
ENSMUSG00000044345	8611.27	8703.55	8967.25	8760.69	Marveld1	0.974
ENSMUSG00000097451	10359	6514.91	9391.83	8755.26	NA	0.974
ENSMUSG00000040033	8940.17	8831.5	8482.03	8751.23	Stat2	0.974
ENSMUSG00000032911	9791.91	8085.92	8371.18	8749.67	Cspg4	0.974
ENSMUSG00000022186	9388.18	9420.26	7438.38	8748.94	Oxct1	0.974
ENSMUSG00000027828	7725.8	9282.69	9196.27	8734.92	Ssr3	0.974
ENSMUSG00000058254	8187.51	10992.2	7021.12	8733.62	Tspan7	0.974
ENSMUSG00000008575	10215.7	7025.75	8903.46	8714.96	Nfib	0.974
ENSMUSG00000026796	9160.48	8904.61	8067.91	8711	Fam129b	0.974
ENSMUSG00000020467	5074.63	8280.25	12774.8	8709.9	Efemp1	0.974
ENSMUSG00000021843	9324.93	8185.01	8605.43	8705.12	Ktn1	0.974
ENSMUSG00000031309	9591.62	9505.88	7012.76	8703.42	Rps6ka3	0.973
ENSMUSG00000072812	9909.97	8152.3	8042.82	8701.7	Ahnak2	0.973
ENSMUSG00000046062	9650.66	8409.16	8034.45	8698.09	Ppp1r15b	0.973
ENSMUSG00000029076	7439.07	9208.61	9407.51	8685.07	Sdf4	0.973
ENSMUSG00000014355	8700.88	8820.91	8532.22	8684.67	Anapc1	0.973
ENSMUSG00000022314	8743.04	9053.73	8244.65	8680.47	Rad21	0.973
ENSMUSG00000031939	8935.95	8514.99	8579.28	8676.74	Taf1d	0.973
ENSMUSG00000053931	8082.1	9179.75	8734.05	8665.3	Cnn3	0.973
ENSMUSG00000028034	9603.22	8525.57	7843.08	8657.29	Fubp1	0.973
ENSMUSG00000027405	8353.01	8175.39	9439.93	8656.11	Nop56	0.973
ENSMUSG00000057969	7791.15	8172.5	9982.67	8648.78	Sema3b	0.973
ENSMUSG00000015932	8888.51	8043.59	9004.9	8645.67	Dstn	0.973
ENSMUSG00000027318	11102.2	7057.5	7739.55	8633.09	Adam33	0.973
ENSMUSG00000029090	9465.13	8874.79	7544	8627.97	Adgra3	0.973
ENSMUSG00000008384	8141.13	8249.46	9457.71	8616.1	Sertad1	0.973
ENSMUSG00000063077	8624.98	8861.32	8349.22	8611.84	Kif1b	0.973
ENSMUSG00000038708	9085.64	8107.08	8570.92	8587.88	Golga4	0.973
ENSMUSG00000034168	8304.52	9828.17	7614.06	8582.25	Irf2bpl	0.973
ENSMUSG00000027642	7130.21	9414.49	9199.41	8581.37	Rpn2	0.973
ENSMUSG00000022091	7491.78	8589.06	9654.31	8578.38	Sorbs3	0.973
ENSMUSG00000056537	9600.06	7884.85	8232.1	8572.34	Rlim	0.973
ENSMUSG00000015090	7669.93	9821.43	8218.5	8569.95	Ptgds	0.973
ENSMUSG00000017421	8977.06	8630.43	8016.67	8541.39	Zfp207	0.973
ENSMUSG00000034109	9348.12	7332.64	8935.88	8538.88	Golim4	0.973
ENSMUSG00000030058	7775.34	8968.11	8854.31	8532.59	Copg1	0.973
ENSMUSG00000005871	8342.47	9099.9	8083.6	8508.66	Apc	0.973
ENSMUSG00000022528	8232.84	8982.54	8308.44	8507.94	Hes1	0.973
ENSMUSG00000040054	8702.98	8368.76	8439.15	8503.63	Baz2a	0.973
ENSMUSG00000020220	8486.89	8872.86	8132.75	8497.5	Vps13d	0.973
ENSMUSG00000025220	8496.37	8362.02	8600.2	8486.2	Mgea5	0.973
ENSMUSG00000058799	9071.93	8285.06	8087.78	8481.59	Nap1l1	0.973
ENSMUSG00000051223	8578.6	8604.46	8255.1	8479.38	Bzw1	0.973
ENSMUSG00000054008	8495.32	9024.87	7891.18	8470.46	Ndst1	0.972
ENSMUSG00000028108	8497.43	7216.24	9687.77	8467.15	Ecm1	0.972
ENSMUSG00000030201	9009.74	8338.93	8043.86	8464.18	Lrp6	0.972
ENSMUSG00000017485	8757.8	8181.16	8451.7	8463.55	Top2b	0.972
ENSMUSG00000028745	7980.9	8970.99	8428.7	8460.2	Capzb	0.972
ENSMUSG00000024921	8226.51	8229.26	8924.38	8460.05	Smarca2	0.972
ENSMUSG00000090733	8354.06	8238.88	8783.2	8458.72	Rps27	0.972
ENSMUSG00000026924	8455.26	8273.52	8643.07	8457.28	Sec16a	0.972
ENSMUSG00000037712	8067.34	9189.37	8098.24	8451.65	Fermt2	0.972
ENSMUSG00000047730	9687.55	5220.97	10445.9	8451.49	Fcgbp	0.972
ENSMUSG00000017119	8338.25	8554.43	8399.42	8430.7	Nbr1	0.972
ENSMUSG00000025314	8424.69	9559.76	7279.42	8421.29	Ptprj	0.972
ENSMUSG00000060803	7683.63	10489.1	7072.37	8415.03	Gstp1	0.972
ENSMUSG00000062867	9264.84	7531.78	8440.2	8412.27	Impdh2	0.972
ENSMUSG00000020919	8514.29	8434.18	8278.11	8408.86	Stat5b	0.972
ENSMUSG00000041120	6606.3	8170.58	10448	8408.3	Nbl1	0.972
ENSMUSG00000003031	8944.38	8445.72	7800.2	8396.77	Cdkn1b	0.972
ENSMUSG00000067212	8034.66	7982.02	9166.99	8394.56	H2-T23	0.972
ENSMUSG00000020777	8929.62	8137.87	8093.01	8386.83	Acox1	0.972
ENSMUSG00000034602	8507.97	8130.17	8503.99	8380.71	Mon2	0.972
ENSMUSG00000002996	8704.04	8389.92	8039.68	8377.88	Hbp1	0.972
ENSMUSG00000024782	8139.02	8488.05	8502.94	8376.67	Ak3	0.972
ENSMUSG00000028082	8811.56	7454.82	8858.5	8374.96	Sh3d19	0.972
ENSMUSG00000055204	8699.82	8169.62	8242.55	8370.66	Ankrd17	0.972
ENSMUSG00000056342	8700.88	8249.46	8160.99	8370.44	Usp34	0.972
ENSMUSG00000015605	9670.68	7702.07	7728.05	8366.93	Srf	0.972
ENSMUSG00000001833	7899.73	8861.32	8327.26	8362.77	2018-09-07	0.972
ENSMUSG00000015839	8230.73	9395.25	7448.83	8358.27	Nfe2l2	0.972
ENSMUSG00000037503	8634.46	8268.7	8169.35	8357.51	Fam168b	0.972
ENSMUSG00000030516	8192.78	8801.67	8051.18	8348.55	Tjp1	0.972
ENSMUSG00000019841	9477.78	7989.71	7515.76	8327.75	Rev3l	0.972
ENSMUSG00000035357	8072.61	8346.63	8557.32	8325.52	Pdzrn3	0.971
ENSMUSG00000029439	8162.21	8501.52	8301.12	8321.61	Sfswap	0.971
ENSMUSG00000046879	7196.62	9328.87	8424.51	8316.67	Irgm1	0.971
ENSMUSG00000022564	7891.3	8999.85	8033.41	8308.18	Grina	0.971
ENSMUSG00000029104	8493.21	8253.31	8150.53	8299.02	Htt	0.971
ENSMUSG00000058325	8262.35	9136.46	7445.7	8281.5	Dock1	0.971
ENSMUSG00000030213	8423.64	8408.2	7992.62	8274.82	Atf7ip	0.971
ENSMUSG00000053754	8223.35	8570.78	8005.17	8266.43	Chd8	0.971
ENSMUSG00000026305	8484.78	8402.43	7901.64	8262.95	Lrrfip1	0.971
ENSMUSG00000020611	9035.04	8050.32	7661.12	8248.83	Gna13	0.971
ENSMUSG00000021754	8113.72	9164.36	7462.43	8246.84	Map3k1	0.971
ENSMUSG00000029714	8283.44	8185.97	8269.74	8246.38	Gigyf1	0.971
ENSMUSG00000002900	6538.83	8200.4	9978.49	8239.24	Lamb1	0.971
ENSMUSG00000022124	8299.25	8435.14	7966.48	8233.62	Fbxl3	0.971
ENSMUSG00000093930	9095.12	8813.22	6792.11	8233.48	Hmgcs1	0.971
ENSMUSG00000039157	7962.98	9071.04	7598.38	8210.8	Fam102a	0.971
ENSMUSG00000038773	8205.43	8261.01	8121.25	8195.9	Kdm3b	0.971
ENSMUSG00000028803	7719.47	9780.06	7077.6	8192.38	Nipal3	0.971
ENSMUSG00000020282	8220.19	8088.8	8265.56	8191.52	Rhbdf1	0.971
ENSMUSG00000026596	9274.33	7033.45	8223.73	8177.17	Abl2	0.971
ENSMUSG00000028967	7499.16	5112.26	11913.1	8174.84	Errfi1	0.971
ENSMUSG00000056608	8243.38	8538.08	7728.05	8169.83	Chd9	0.971
ENSMUSG00000048078	8264.46	8913.27	7285.7	8154.48	Tenm4	0.971
ENSMUSG00000038274	8330.87	8370.68	7757.33	8152.96	Fau	0.971
ENSMUSG00000036617	9090.91	8217.72	7125.7	8144.77	Etl4	0.971
ENSMUSG00000031342	7385.31	7965.66	9067.65	8139.54	Gpm6b	0.971
ENSMUSG00000003534	9454.59	6900.69	8052.23	8135.83	Ddr1	0.971
ENSMUSG00000020034	7958.76	8353.36	8095.1	8135.74	Tcp11l2	0.971
ENSMUSG00000025016	7934.52	8227.34	8201.77	8121.21	Tm9sf3	0.971
ENSMUSG00000016933	7569.78	8959.45	7814.84	8114.69	Plcg1	0.971
ENSMUSG00000020108	7358.95	8259.08	8716.28	8111.44	Ddit4	0.971
ENSMUSG00000020821	8072.61	8155.18	8087.78	8105.19	Kif1c	0.97
ENSMUSG00000029071	7730.01	8191.74	8352.36	8091.37	Dvl1	0.97
ENSMUSG00000053646	9032.93	6339.82	8862.68	8078.48	Plxnb1	0.97
ENSMUSG00000027479	8653.44	7469.25	8095.1	8072.6	Mapre1	0.97
ENSMUSG00000027177	8475.29	7808.85	7931.97	8072.04	Hipk3	0.97
ENSMUSG00000054874	8188.56	8017.61	7973.8	8059.99	Pcnx3	0.97
ENSMUSG00000021775	9142.56	7391.33	7639.16	8057.68	Nr1d2	0.97
ENSMUSG00000033016	9805.61	6973.8	7392.36	8057.26	Nfatc1	0.97
ENSMUSG00000075602	5026.14	8106.12	11024.2	8052.17	Ly6a	0.97
ENSMUSG00000055670	8106.34	8371.64	7674.71	8050.9	Zzef1	0.97
ENSMUSG00000022505	8941.22	6562.05	8624.25	8042.51	Emp2	0.97
ENSMUSG00000032594	8309.79	7605.86	8194.45	8036.7	Ip6k1	0.97
ENSMUSG00000009470	8645.01	7756.9	7692.49	8031.47	Tnpo1	0.97
ENSMUSG00000019947	8444.72	7201.81	8439.15	8028.56	Arid5b	0.97
ENSMUSG00000048874	8186.46	7842.52	8056.41	8028.46	Phf3	0.97
ENSMUSG00000037706	7100.69	8465.92	8511.31	8025.97	Cd81	0.97
ENSMUSG00000022477	7712.09	8749.72	7615.11	8025.64	Aco2	0.97
ENSMUSG00000020088	7171.32	8068.6	8819.8	8019.91	Sar1a	0.97
ENSMUSG00000062270	7599.3	8199.44	8253.01	8017.25	Morf4l1	0.97
ENSMUSG00000032621	8380.42	7549.1	8107.65	8012.39	Srek1	0.97
ENSMUSG00000031431	5915.84	5061.27	13055.1	8010.73	Tsc22d3	0.97
ENSMUSG00000028656	7867.05	8184.05	7963.34	8004.81	Cap1	0.97
ENSMUSG00000059898	11303.5	4964.11	7731.19	7999.61	Dsc3	0.97
ENSMUSG00000048285	8141.13	7354.77	8470.53	7988.81	Frmd6	0.97
ENSMUSG00000004677	8016.74	7591.43	8346.08	7984.75	Myo9b	0.97
ENSMUSG00000018293	7968.25	8740.1	7240.73	7983.03	Pfn1	0.97
ENSMUSG00000022010	6955.22	8588.1	8391.05	7978.12	Tsc22d1	0.97
ENSMUSG00000020250	8660.82	7830.98	7431.06	7974.28	Txnrd1	0.97
ENSMUSG00000057193	7987.22	7220.08	8693.27	7966.86	Slc44a2	0.97
ENSMUSG00000004105	7555.02	9024.87	7283.61	7954.5	Angptl2	0.97
ENSMUSG00000028452	7911.32	8373.57	7564.91	7949.93	Vcp	0.97
ENSMUSG00000031918	8439.45	7924.3	7476.02	7946.59	Mtmr2	0.969
ENSMUSG00000026674	8251.81	6881.45	8666.08	7933.11	Ddr2	0.969
ENSMUSG00000078671	8359.33	8043.59	7392.36	7931.76	Chd2	0.969
ENSMUSG00000037174	7622.49	8423.59	7693.54	7913.21	Elf2	0.969
ENSMUSG00000034708	6676.93	8370.68	8666.08	7904.56	Grn	0.969
ENSMUSG00000019726	9022.39	8289.87	6398.91	7903.72	Lyst	0.969
ENSMUSG00000035828	7691.01	7951.23	8058.5	7900.25	Pim3	0.969
ENSMUSG00000006273	8799.96	7816.55	7064	7893.5	Atp6v1b2	0.969
ENSMUSG00000040945	7964.03	8730.48	6977.2	7890.57	Rcc2	0.969
ENSMUSG00000014496	8013.58	7711.69	7912.1	7879.12	Ankrd28	0.969
ENSMUSG00000002980	9347.06	5848.22	8391.05	7862.11	Bcam	0.969
ENSMUSG00000022500	8342.47	7539.48	7690.4	7857.45	Litaf	0.969
ENSMUSG00000043631	5119.96	8707.39	9740.06	7855.8	Ecm2	0.969
ENSMUSG00000027580	7701.55	7413.45	8449.61	7854.87	Helz2	0.969
ENSMUSG00000053510	7649.9	7977.21	7914.19	7847.1	Nrd1	0.969
ENSMUSG00000032096	7292.54	7935.84	8292.75	7840.38	Arcn1	0.969
ENSMUSG00000034525	7861.78	7888.7	7767.79	7839.42	Ice1	0.969
ENSMUSG00000021218	7507.59	7891.59	8110.79	7836.66	Gdi2	0.969
ENSMUSG00000045954	6102.42	9847.41	7479.16	7809.66	Cavin2	0.969
ENSMUSG00000038342	8057.85	7185.45	8185.04	7809.45	Mlxip	0.969
ENSMUSG00000038371	7592.97	8469.77	7365.17	7809.31	Sbf2	0.969
ENSMUSG00000025571	7854.4	7850.22	7675.76	7793.46	Tnrc6c	0.969
ENSMUSG00000005533	8125.31	7810.78	7428.97	7788.35	Igf1r	0.969
ENSMUSG00000052146	7849.13	7844.45	7665.3	7786.29	Rps10	0.969
ENSMUSG00000015120	7784.83	8051.28	7495.89	7777.33	Ube2i	0.969
ENSMUSG00000015755	7873.38	7536.59	7915.24	7775.07	Tab2	0.969
ENSMUSG00000026814	6184.64	9371.2	7758.37	7771.41	Eng	0.969
ENSMUSG00000026554	7461.21	8019.54	7814.84	7765.2	Dcaf8	0.969
ENSMUSG00000028173	7465.42	7977.21	7844.13	7762.25	Wls	0.969
ENSMUSG00000026574	4471.66	7656.85	11153.9	7760.81	Dpt	0.969
ENSMUSG00000028525	7894.46	7711.69	7671.58	7759.24	Pde4b	0.969
ENSMUSG00000013663	7793.26	7753.05	7724.91	7757.07	Pten	0.968
ENSMUSG00000001911	8072.61	6436.99	8741.37	7750.32	Nfix	0.968
ENSMUSG00000018340	6765.47	8572.71	7912.1	7750.09	Anxa6	0.968
ENSMUSG00000026277	7643.57	7450.01	8121.25	7738.28	Stk25	0.968
ENSMUSG00000036620	7429.58	8747.8	7006.48	7727.96	Mgat4b	0.968
ENSMUSG00000059970	7245.11	7763.64	8164.12	7724.29	Hspa2	0.968
ENSMUSG00000053841	7716.31	7576.04	7874.45	7722.27	Txlna	0.968
ENSMUSG00000022636	8685.06	7172.95	7290.93	7716.31	Alcam	0.968
ENSMUSG00000034354	7526.56	8101.31	7509.49	7712.45	Mtmr3	0.968
ENSMUSG00000030096	9009.74	6434.1	7676.81	7706.88	Slc6a6	0.968
ENSMUSG00000029062	7621.44	7732.85	7721.77	7692.02	Cdk11b	0.968
ENSMUSG00000036596	4897.54	7668.39	10505.5	7690.49	Cpz	0.968
ENSMUSG00000028412	7047.98	7986.83	8000.99	7678.6	Slc44a1	0.968
ENSMUSG00000032531	7393.74	7840.6	7779.29	7671.21	Amotl2	0.968
ENSMUSG00000001419	8046.25	7224.9	7719.68	7663.61	Mef2d	0.968
ENSMUSG00000001280	8184.35	7520.24	7229.23	7644.61	Sp1	0.968
ENSMUSG00000024002	7781.67	7620.29	7526.22	7642.73	Brd4	0.968
ENSMUSG00000003360	7233.51	7903.13	7787.66	7641.43	Ddx23	0.968
ENSMUSG00000022389	8201.21	7837.71	6851.71	7630.21	Tef	0.968
ENSMUSG00000062006	7631.98	7651.08	7595.24	7626.1	Rpl34	0.968
ENSMUSG00000040548	7588.76	8565.97	6670.8	7608.51	Tex2	0.968
ENSMUSG00000020923	7597.19	7581.81	7628.7	7602.57	Ubtf	0.968
ENSMUSG00000047216	7706.82	6228.23	8855.36	7596.8	Cdh19	0.968
ENSMUSG00000034024	7897.62	7900.24	6966.75	7588.2	Cct2	0.968
ENSMUSG00000050708	7495.99	7737.66	7529.36	7587.67	Ftl1	0.968
ENSMUSG00000003746	6552.54	6937.25	9250.65	7580.14	Man1a	0.968
ENSMUSG00000041638	7330.49	7825.21	7528.31	7561.34	Gcn1l1	0.968
ENSMUSG00000041577	4904.92	9256.72	8519.68	7560.44	Prelp	0.968
ENSMUSG00000022914	8102.12	7165.25	7392.36	7553.25	Brwd1	0.968
ENSMUSG00000001847	7308.36	7999.33	7334.85	7547.51	Rac1	0.968
ENSMUSG00000005886	7642.52	7753.05	7237.59	7544.39	Ncoa2	0.968
ENSMUSG00000033420	5887.37	7638.57	9097.97	7541.31	Antxr1	0.967
ENSMUSG00000074364	6334.33	7572.19	8702.68	7536.4	Ehd2	0.967
ENSMUSG00000002265	8432.07	6273.44	7875.5	7527	Peg3	0.967
ENSMUSG00000069662	7992.49	8148.45	6424.01	7521.65	Marcks	0.967
ENSMUSG00000037652	7695.23	7510.62	7355.76	7520.54	Phc3	0.967
ENSMUSG00000033502	7373.71	8322.58	6860.08	7518.79	Cdc14a	0.967
ENSMUSG00000031858	7213.48	7474.06	7823.21	7503.59	Mau2	0.967
ENSMUSG00000031010	8204.38	6968.99	7306.61	7493.33	Usp9x	0.967
ENSMUSG00000018326	7230.35	8007.99	7240.73	7493.02	Ywhab	0.967
ENSMUSG00000036698	8317.17	6975.73	7168.57	7487.16	Ago2	0.967
ENSMUSG00000014905	7479.13	7089.25	7868.18	7478.85	Dnajb9	0.967
ENSMUSG00000004655	5461.5	7594.32	9380.32	7478.71	Aqp1	0.967
ENSMUSG00000071646	7778.5	7372.09	7281.52	7477.37	Mta2	0.967
ENSMUSG00000067288	7299.92	7930.07	7190.54	7473.51	Rps28	0.967
ENSMUSG00000025332	7435.91	7574.11	7371.45	7460.49	Kdm5c	0.967
ENSMUSG00000032504	7313.63	7647.23	7408.05	7456.3	Pdcd6ip	0.967
ENSMUSG00000032412	7400.07	7463.48	7503.21	7455.59	Atp1b3	0.967
ENSMUSG00000045098	7734.23	7611.63	7007.53	7451.13	Kmt5b	0.967
ENSMUSG00000038095	7915.54	7308.59	7128.84	7450.99	Sbno1	0.967
ENSMUSG00000022094	6633.71	7835.79	7880.73	7450.07	Slc39a14	0.967
ENSMUSG00000045039	7610.89	7313.4	7417.46	7447.25	Megf8	0.967
ENSMUSG00000021242	6595.76	7896.4	7813.8	7435.32	Npc2	0.967
ENSMUSG00000069729	7798.53	7326.87	7164.39	7429.93	Arid1b	0.967
ENSMUSG00000022415	6819.23	8917.12	6523.35	7419.9	Syngr1	0.967
ENSMUSG00000037236	7832.26	7021.91	7404.91	7419.69	Matr3	0.967
ENSMUSG00000006740	7835.43	7376.9	7030.54	7414.29	Kif5b	0.967
ENSMUSG00000038463	6003.33	6739.07	9478.62	7407.01	Olfml2b	0.967
ENSMUSG00000019823	7508.64	7644.34	7062.95	7405.31	Mical1	0.967
ENSMUSG00000030894	7051.15	8048.4	7101.65	7400.4	Tpp1	0.967
ENSMUSG00000032050	7461.21	7323.02	7395.5	7393.24	Rdx	0.967
ENSMUSG00000056076	7559.24	8054.17	6566.23	7393.21	Eif3b	0.967
ENSMUSG00000028469	6484.02	7762.67	7927.78	7391.49	Npr2	0.966
ENSMUSG00000022475	6941.52	7514.47	7705.04	7387.01	Hdac7	0.966
ENSMUSG00000020571	6612.62	7658.77	7852.49	7374.63	Pdia6	0.966
ENSMUSG00000017291	8126.37	6911.27	7073.41	7370.35	Taok1	0.966
ENSMUSG00000055491	8097.91	6840.08	7166.48	7368.16	Pprc1	0.966
ENSMUSG00000044864	7805.91	7851.18	6424.01	7360.37	Ankrd50	0.966
ENSMUSG00000070691	7226.13	8546.73	6303.74	7358.87	Runx3	0.966
ENSMUSG00000027883	7036.39	8036.85	6987.66	7353.63	Gpsm2	0.966
ENSMUSG00000030029	9125.69	5642.34	7280.47	7349.5	Lrig1	0.966
ENSMUSG00000026615	7129.15	7445.2	7426.87	7333.74	Eprs	0.966
ENSMUSG00000021500	7447.5	7473.1	7076.55	7332.38	Ddx46	0.966
ENSMUSG00000024421	8716.69	6188.78	7087.01	7330.83	Lama3	0.966
ENSMUSG00000020427	6177.26	6791.02	9014.31	7327.53	Igfbp3	0.966
ENSMUSG00000010175	5702.9	10765.2	5493.29	7320.46	Prox1	0.966
ENSMUSG00000035597	7673.09	6902.61	7385.04	7320.25	Prpf39	0.966
ENSMUSG00000030122	7328.38	6828.54	7794.98	7317.3	Ptms	0.966
ENSMUSG00000001300	9571.6	5686.6	6681.26	7313.15	Efnb2	0.966
ENSMUSG00000054611	7635.14	7360.54	6928.05	7307.91	Kdm2a	0.966
ENSMUSG00000036817	7354.74	6990.16	7550.27	7298.39	Sun1	0.966
ENSMUSG00000025969	6523.02	7603.94	7755.24	7294.07	Nrp2	0.966
ENSMUSG00000028849	7764.8	7277.81	6817.2	7286.6	Map7d1	0.966
ENSMUSG00000033732	7217.7	7628.95	6984.52	7277.06	Sf3b3	0.966
ENSMUSG00000031666	6915.16	8073.41	6821.39	7269.99	Rbl2	0.966
ENSMUSG00000037235	6977.36	7503.89	7319.16	7266.8	Mxd4	0.966
ENSMUSG00000009291	6382.82	7610.67	7804.39	7265.96	Pttg1ip	0.966
ENSMUSG00000074794	6569.4	5499.96	9720.19	7263.19	Arrdc3	0.966
ENSMUSG00000032212	7552.92	7021.91	7209.36	7261.39	Sltm	0.966
ENSMUSG00000001870	5452.01	6963.22	9362.55	7259.26	Ltbp1	0.966
ENSMUSG00000027893	7600.35	6974.77	7177.99	7251.03	Ahcyl1	0.966
ENSMUSG00000020075	7680.47	7595.28	6476.29	7250.68	Ddx21	0.966
ENSMUSG00000008730	7650.95	6889.14	7209.36	7249.82	Hipk1	0.966
ENSMUSG00000021374	7698.39	7116.18	6930.15	7248.24	Nup153	0.966
ENSMUSG00000026987	7297.81	7179.68	7258.51	7245.33	Baz2b	0.965
ENSMUSG00000035696	7539.21	7432.7	6701.13	7224.34	Rnf38	0.965
ENSMUSG00000034290	6864.56	7620.29	7182.17	7222.34	Nek9	0.965
ENSMUSG00000038437	7187.13	6971.88	7495.89	7218.3	Mllt6	0.965
ENSMUSG00000022858	7743.72	6616.89	7294.06	7218.22	Tra2b	0.965
ENSMUSG00000042650	7744.77	7092.13	6807.79	7214.9	Alkbh5	0.965
ENSMUSG00000006998	7217.7	7665.51	6741.91	7208.37	Psmd2	0.965
ENSMUSG00000025410	6769.69	7749.21	7102.69	7207.2	Dctn2	0.965
ENSMUSG00000030530	7456.99	7378.82	6784.79	7206.87	Furin	0.965
ENSMUSG00000036334	5404.58	8196.55	7992.62	7197.92	Igsf10	0.965
ENSMUSG00000021140	7200.83	7102.72	7286.74	7196.76	Pcnx	0.965
ENSMUSG00000029528	6564.13	8072.45	6947.92	7194.83	Pxn	0.965
ENSMUSG00000031530	7247.22	8203.29	6109.24	7186.58	Dusp4	0.965
ENSMUSG00000025745	7551.86	7036.34	6955.24	7181.15	Hadha	0.965
ENSMUSG00000035168	7111.23	7736.7	6688.58	7178.84	Tanc1	0.965
ENSMUSG00000028059	6749.66	7864.65	6915.5	7176.61	Arhgef2	0.965
ENSMUSG00000021427	6462.94	7432.7	7605.7	7167.11	Ssr1	0.965
ENSMUSG00000027936	8290.81	7132.54	6075.77	7166.38	Crtc2	0.965
ENSMUSG00000022510	9800.34	4313.77	7356.81	7156.98	Trp63	0.965
ENSMUSG00000066232	7759.53	6940.13	6761.78	7153.81	Ipo7	0.965
ENSMUSG00000024236	6977.36	6791.98	7664.26	7144.53	Svil	0.965
ENSMUSG00000021248	6379.66	7838.67	7211.45	7143.26	Tmed10	0.965
ENSMUSG00000006356	6493.51	7255.68	7659.03	7136.07	Crip2	0.965
ENSMUSG00000036046	7447.5	7455.78	6502.44	7135.24	5031439G07Rik	0.965
ENSMUSG00000018474	7293.6	6871.83	7225.04	7130.16	Chd3	0.965
ENSMUSG00000014956	7354.74	6925.7	7075.5	7118.65	Ppp1cb	0.965
ENSMUSG00000041268	7887.08	7015.17	6448.06	7116.77	Dmxl2	0.965
ENSMUSG00000001552	8646.06	5752.02	6945.83	7114.64	Jup	0.965
ENSMUSG00000028078	7172.37	7136.39	7031.58	7113.45	Dclk2	0.965
ENSMUSG00000018567	6508.26	7444.24	7372.49	7108.33	Gabarap	0.965
ENSMUSG00000020097	7745.82	7217.2	6352.89	7105.31	Sgpl1	0.965
ENSMUSG00000002546	6898.3	7166.21	7245.96	7103.49	Golga2	0.964
ENSMUSG00000032328	6699.06	7472.14	7137.2	7102.8	Tmem30a	0.964
ENSMUSG00000032253	7423.26	6764.08	7114.2	7100.51	Phip	0.964
ENSMUSG00000062232	7493.88	7870.42	5927.28	7097.19	Rapgef2	0.964
ENSMUSG00000024908	7365.28	7017.1	6889.36	7090.58	Ppp6r3	0.964
ENSMUSG00000022330	7798.53	4975.65	8476.8	7083.66	Osr2	0.964
ENSMUSG00000037331	7331.55	6868.94	7050.41	7083.63	Larp1	0.964
ENSMUSG00000036427	7425.37	7058.46	6758.64	7080.82	Gpi1	0.964
ENSMUSG00000026491	7423.26	6807.37	7001.26	7077.29	Ahctf1	0.964
ENSMUSG00000029547	6906.73	7439.43	6878.9	7075.02	Ints1	0.964
ENSMUSG00000020385	7022.68	7094.06	7107.92	7074.89	Clk4	0.964
ENSMUSG00000026303	6399.69	8250.43	6568.32	7072.81	Mlph	0.964
ENSMUSG00000043940	6885.65	7505.81	6810.93	7067.46	Wdfy3	0.964
ENSMUSG00000027706	6501.94	7414.42	7270.01	7062.12	Sec62	0.964
ENSMUSG00000042744	7181.86	6980.54	7019.03	7060.48	Hectd4	0.964
ENSMUSG00000054693	6596.81	7474.06	7082.82	7051.23	Adam10	0.964
ENSMUSG00000000142	7311.52	7332.64	6487.8	7043.99	Axin2	0.964
ENSMUSG00000020817	6899.35	7398.06	6832.89	7043.43	Rabep1	0.964
ENSMUSG00000038650	6986.84	7160.44	6973.02	7040.1	Rnh1	0.964
ENSMUSG00000019843	6623.16	7246.06	7250.14	7039.79	Fyn	0.964
ENSMUSG00000024012	6578.89	7411.53	7127.79	7039.4	Mtch1	0.964
ENSMUSG00000022234	7255.65	7419.23	6435.51	7036.79	Cct5	0.964
ENSMUSG00000015889	6755.99	7754.98	6588.19	7033.05	Lta4h	0.964
ENSMUSG00000005338	5463.61	5897.28	9723.33	7028.07	Cadm3	0.964
ENSMUSG00000025362	7142.86	7075.78	6843.35	7020.66	Rps26	0.964
ENSMUSG00000020580	7252.49	6686.15	7117.33	7018.66	Rock2	0.964
ENSMUSG00000034892	6860.35	7358.62	6829.75	7016.24	Rps29	0.964
ENSMUSG00000029713	6820.29	7381.71	6844.39	7015.46	Gnb2	0.964
ENSMUSG00000001127	7256.7	6502.41	7268.97	7009.36	Araf	0.964
ENSMUSG00000028435	9429.29	4225.26	7353.67	7002.74	Aqp3	0.964
ENSMUSG00000004562	6545.16	7302.82	7158.12	7002.03	Arhgef40	0.964
ENSMUSG00000025006	6769.69	7541.41	6676.03	6995.71	Sorbs1	0.963
ENSMUSG00000022974	7318.9	6368.68	7268.97	6985.52	Paxbp1	0.963
ENSMUSG00000041308	7124.94	7112.34	6707.4	6981.56	Sntb2	0.963
ENSMUSG00000022312	7045.88	6984.39	6891.45	6973.9	Eif3h	0.963
ENSMUSG00000042688	7692.06	6422.56	6793.15	6969.26	Mapk6	0.963
ENSMUSG00000043733	6975.25	7149.86	6780.6	6968.57	Ptpn11	0.963
ENSMUSG00000044447	7207.16	7099.83	6578.78	6961.92	Dock5	0.963
ENSMUSG00000028163	7050.09	6470.66	7336.94	6952.56	Nfkb1	0.963
ENSMUSG00000030852	7763.74	5756.83	7335.89	6952.16	Tacc2	0.963
ENSMUSG00000010453	6979.46	6883.37	6974.07	6945.63	Kansl3	0.963
ENSMUSG00000032042	6520.91	7247.98	7059.82	6942.9	Srpr	0.963
ENSMUSG00000079477	6341.71	7414.42	7027.4	6927.84	Rab7	0.963
ENSMUSG00000025234	7591.92	6405.24	6784.79	6927.32	Arih1	0.963
ENSMUSG00000034640	7618.27	5915.56	7242.82	6925.55	Tiparp	0.963
ENSMUSG00000052310	6788.66	7289.35	6693.81	6923.94	Slc39a1	0.963
ENSMUSG00000024811	7307.3	6659.22	6779.56	6915.36	Tnks2	0.963
ENSMUSG00000032437	6391.25	7382.67	6962.56	6912.16	Stt3b	0.963
ENSMUSG00000032393	7033.23	7050.77	6632.11	6905.37	Dpp8	0.963
ENSMUSG00000021375	6737.01	7126.77	6836.03	6899.94	Kif13a	0.963
ENSMUSG00000031592	7018.47	6873.75	6782.7	6891.64	Pcm1	0.963
ENSMUSG00000039367	6991.06	6728.48	6916.55	6878.7	Sec24c	0.963
ENSMUSG00000035093	7568.73	6289.8	6776.42	6878.31	Secisbp2l	0.963
ENSMUSG00000000538	6744.39	6692.89	7141.39	6859.56	Tom1l2	0.963
ENSMUSG00000009741	7142.86	6462	6958.38	6854.41	Ubp1	0.963
ENSMUSG00000018417	6480.86	7803.08	6278.65	6854.19	Myo1b	0.963
ENSMUSG00000021957	7114.39	7255.68	6181.39	6850.49	Tkt	0.963
ENSMUSG00000022665	3925.62	7347.07	9270.52	6847.74	Ccdc80	0.963
ENSMUSG00000005506	7303.09	6754.46	6480.48	6846.01	Celf1	0.963
ENSMUSG00000028111	4994.52	7108.49	8428.7	6843.9	Ctsk	0.963
ENSMUSG00000017144	7103.85	6255.16	7148.71	6835.91	Rnd3	0.963
ENSMUSG00000020640	6570.46	7023.83	6911.32	6835.2	Itsn2	0.963
ENSMUSG00000037458	7269.35	5633.69	7600.47	6834.5	Azin1	0.962
ENSMUSG00000034462	6329.06	6786.21	7387.14	6834.13	Pkd2	0.962
ENSMUSG00000028580	6913.05	6781.4	6807.79	6834.08	Pum1	0.962
ENSMUSG00000018909	5731.36	7309.55	7451.97	6830.96	Arrb1	0.962
ENSMUSG00000001794	6080.28	7370.16	7036.81	6829.09	Capns1	0.962
ENSMUSG00000017404	6858.24	7044.03	6576.68	6826.32	Rpl19	0.962
ENSMUSG00000037369	6994.22	6708.28	6746.09	6816.2	Kdm6a	0.962
ENSMUSG00000033577	6893.02	7061.35	6466.88	6807.08	Myo6	0.962
ENSMUSG00000026867	6750.72	6805.45	6861.13	6805.76	Gapvd1	0.962
ENSMUSG00000028382	7109.12	6866.06	6424.01	6799.73	Ptbp3	0.962
ENSMUSG00000028868	6543.05	6791.98	7064	6799.68	Wasf2	0.962
ENSMUSG00000023175	5881.05	7047.88	7432.1	6787.01	Bsg	0.962
ENSMUSG00000037857	7520.24	6180.12	6643.61	6781.32	Nufip2	0.962
ENSMUSG00000027803	6789.72	6692.89	6854.85	6779.15	Wwtr1	0.962
ENSMUSG00000031314	6960.49	6768.89	6596.55	6775.31	Taf1	0.962
ENSMUSG00000019790	6649.52	7154.67	6516.03	6773.41	Stxbp5	0.962
ENSMUSG00000041977	6877.21	7100.79	6330.93	6769.65	Arhgef11	0.962
ENSMUSG00000028676	6933.08	6793.9	6572.5	6766.5	Srsf10	0.962
ENSMUSG00000034022	6651.63	6743.88	6888.32	6761.27	Cpsf1	0.962
ENSMUSG00000050377	7842.81	4389.77	8050.14	6760.91	Il31ra	0.962
ENSMUSG00000020592	9041.36	4760.16	6451.19	6750.9	Sdc1	0.962
ENSMUSG00000036644	6039.17	7286.47	6917.6	6747.74	Tbc1d9b	0.962
ENSMUSG00000042524	6548.32	6213.79	7470.79	6744.3	Sun2	0.962
ENSMUSG00000031808	7856.51	5245.02	7128.84	6743.46	Slc27a1	0.962
ENSMUSG00000058135	5976.98	7118.11	7124.65	6739.91	Gstm1	0.962
ENSMUSG00000053411	6640.03	6693.85	6879.95	6737.94	Cbx7	0.962
ENSMUSG00000037679	7124.94	6356.18	6732.5	6737.87	Inf2	0.962
ENSMUSG00000002147	6420.77	6867.98	6898.77	6729.17	Stat6	0.962
ENSMUSG00000021111	6927.81	6947.83	6307.93	6727.86	Papola	0.962
ENSMUSG00000033392	6653.73	6812.18	6704.26	6723.39	Clasp2	0.962
ENSMUSG00000011877	6325.9	7016.13	6824.53	6722.19	Git1	0.962
ENSMUSG00000019907	6391.25	6963.22	6808.84	6721.1	Ppp1r12a	0.961
ENSMUSG00000042626	6412.34	7164.29	6578.78	6718.47	Shc1	0.961
ENSMUSG00000033763	6725.42	6975.73	6443.87	6715.01	Mtss1l	0.961
ENSMUSG00000034297	7357.9	6436.99	6338.25	6711.05	Med13	0.961
ENSMUSG00000058006	6897.24	6934.36	6292.24	6707.95	Mdn1	0.961
ENSMUSG00000027864	4849.05	7347.07	7910.01	6702.04	Ptgfrn	0.961
ENSMUSG00000015149	6341.71	6917.04	6840.21	6699.65	Sirt2	0.961
ENSMUSG00000022390	6415.5	7109.45	6565.18	6696.71	Zc3h7b	0.961
ENSMUSG00000017760	6258.43	7104.64	6725.18	6696.08	Ctsa	0.961
ENSMUSG00000022799	6316.41	7510.62	6242.05	6689.69	Arhgap31	0.961
ENSMUSG00000025980	7861.78	6465.85	5734.86	6687.5	Hspd1	0.961
ENSMUSG00000030662	7258.81	6560.13	6227.41	6682.11	Ipo5	0.961
ENSMUSG00000014867	5503.67	6982.46	7556.55	6680.89	Surf4	0.961
ENSMUSG00000024188	6938.35	6465.85	6637.34	6680.51	Luc7l	0.961
ENSMUSG00000090862	6659.01	6767.93	6611.19	6679.38	Rps13	0.961
ENSMUSG00000022521	6912	6494.71	6631.06	6679.26	Crebbp	0.961
ENSMUSG00000023118	6585.22	6678.46	6765.96	6676.55	Sympk	0.961
ENSMUSG00000041415	6895.13	6594.76	6539.04	6676.31	Dicer1	0.961
ENSMUSG00000030062	5931.65	7429.81	6664.53	6675.33	Rpn1	0.961
ENSMUSG00000002496	6526.18	6817.95	6681.26	6675.13	Tsc2	0.961
ENSMUSG00000068267	6630.54	7019.98	6368.58	6673.04	Cenpb	0.961
ENSMUSG00000031486	5290.73	7288.39	7439.42	6672.85	Adgra2	0.961
ENSMUSG00000018377	6807.64	6478.35	6662.43	6649.48	Vezf1	0.961
ENSMUSG00000026509	5903.19	7128.69	6914.46	6648.78	Capn2	0.961
ENSMUSG00000003429	6550.43	6732.33	6657.21	6646.66	Rps11	0.961
ENSMUSG00000055053	6093.99	7290.31	6540.08	6641.46	Nfic	0.961
ENSMUSG00000009681	6110.85	7391.33	6421.91	6641.36	Bcr	0.961
ENSMUSG00000038324	6516.7	6697.7	6688.58	6634.32	Trpc4ap	0.961
ENSMUSG00000048758	6654.79	7022.87	6221.13	6632.93	Rpl29	0.961
ENSMUSG00000060938	6627.38	6661.14	6600.74	6629.75	Rpl26	0.961
ENSMUSG00000020598	6335.38	7725.15	5826.89	6629.14	Nrcam	0.961
ENSMUSG00000031659	7015.3	6750.61	6115.51	6627.14	Adcy7	0.96
ENSMUSG00000034252	6624.22	6698.66	6557.86	6626.91	Senp6	0.96
ENSMUSG00000026883	6364.9	7267.22	6222.18	6618.1	Dab2ip	0.96
ENSMUSG00000041734	6485.07	6652.48	6707.4	6614.99	Kirrel	0.96
ENSMUSG00000030016	6415.5	6837.19	6588.19	6613.63	Zfp638	0.96
ENSMUSG00000076258	11169.7	4881.37	3780.36	6610.47	NA	0.96
ENSMUSG00000032382	6229.97	6943.02	6656.16	6609.72	Snx1	0.96
ENSMUSG00000021453	6507.21	6213.79	7105.83	6608.94	Gadd45g	0.96
ENSMUSG00000037373	6311.14	6773.7	6733.55	6606.13	Ctbp1	0.96
ENSMUSG00000032741	5254.89	8220.6	6341.39	6605.63	Tpcn1	0.96
ENSMUSG00000020538	6641.09	6470.66	6689.62	6600.46	Srebf1	0.96
ENSMUSG00000051695	6502.99	7020.94	6258.78	6594.24	Pcbp1	0.96
ENSMUSG00000060657	6609.46	6532.23	6639.43	6593.71	Marf1	0.96
ENSMUSG00000038366	6360.68	7155.63	6258.78	6591.7	Lasp1	0.96
ENSMUSG00000031708	7000.55	6342.71	6425.05	6589.44	Tecr	0.96
ENSMUSG00000045294	6592.59	7645.31	5488.06	6575.32	Insig1	0.96
ENSMUSG00000026510	6352.25	6734.26	6628.97	6571.83	Trp53bp2	0.96
ENSMUSG00000033066	6510.37	5676.98	7520.99	6569.45	Gas7	0.96
ENSMUSG00000057110	6992.11	6264.78	6442.83	6566.57	Cntrl	0.96
ENSMUSG00000052752	6260.54	6863.17	6569.36	6564.36	Traf7	0.96
ENSMUSG00000026519	6597.87	6032.93	7060.86	6563.89	Tmem63a	0.96
ENSMUSG00000056851	6653.73	6398.51	6637.34	6563.19	Pcbp2	0.96
ENSMUSG00000026878	6842.43	6460.08	6384.27	6562.26	Rab14	0.96
ENSMUSG00000029581	6174.1	7928.14	5584.27	6562.17	Fscn1	0.96
ENSMUSG00000034807	5936.92	6939.17	6799.43	6558.51	Colgalt1	0.96
ENSMUSG00000025613	6763.37	6788.13	6121.79	6557.76	Cct8	0.96
ENSMUSG00000016128	6328.01	6028.12	7312.89	6556.34	Stard13	0.96
ENSMUSG00000025066	6049.71	6822.76	6785.83	6552.77	Sfr1	0.96
ENSMUSG00000026657	6520.91	6675.57	6459.56	6552.02	Frmd4a	0.96
ENSMUSG00000040725	6468.21	6725.6	6453.29	6549.03	Hnrnpul1	0.96
ENSMUSG00000015714	6087.66	7140.24	6409.36	6545.75	Cers2	0.96
ENSMUSG00000020393	6073.96	6478.35	7062.95	6538.42	Kremen1	0.96
ENSMUSG00000061032	6535.67	6710.21	6358.12	6534.67	Rrp1	0.959
ENSMUSG00000026335	5194.8	6782.36	7611.97	6529.71	Pam	0.959
ENSMUSG00000003778	6407.07	6555.32	6610.15	6524.18	Brd8	0.959
ENSMUSG00000042613	5812.53	7348.04	6410.41	6523.66	Pbxip1	0.959
ENSMUSG00000007739	6842.43	6478.35	6249.37	6523.38	Cct4	0.959
ENSMUSG00000056429	6047.6	6611.12	6911.32	6523.35	Tgoln1	0.959
ENSMUSG00000040724	6216.27	5751.05	7601.51	6522.94	Kcna2	0.959
ENSMUSG00000020827	6847.7	5948.27	6758.64	6518.2	Mink1	0.959
ENSMUSG00000022770	5500.51	7414.42	6612.24	6509.05	Dlg1	0.959
ENSMUSG00000062901	6757.04	6691.93	6076.82	6508.6	Klhl24	0.959
ENSMUSG00000017776	6418.66	6998.82	6105.05	6507.51	Crk	0.959
ENSMUSG00000028788	6246.84	6421.59	6838.12	6502.18	Ptp4a2	0.959
ENSMUSG00000030189	6310.08	6129.14	7034.72	6491.31	Ybx3	0.959
ENSMUSG00000037012	6669.55	7423.07	5355.25	6482.63	Hk1	0.959
ENSMUSG00000024927	6453.45	6259.97	6727.27	6480.23	Rela	0.959
ENSMUSG00000026490	6156.18	6810.26	6466.88	6477.77	Cdc42bpa	0.959
ENSMUSG00000026821	6843.48	6412.94	6147.93	6468.11	Ralgds	0.959
ENSMUSG00000057561	6790.77	6573.6	6033.94	6466.1	Eif1a	0.959
ENSMUSG00000026977	6730.69	6123.36	6531.72	6461.92	2018-03-07	0.959
ENSMUSG00000040605	6012.82	7970.47	5382.44	6455.24	Bace2	0.959
ENSMUSG00000050812	6589.43	6311.92	6463.74	6455.03	AI314180	0.959
ENSMUSG00000028184	8025.17	5460.52	5877.08	6454.26	Adgrl2	0.959
ENSMUSG00000049516	7420.09	5563.46	6377.99	6453.85	Spty2d1	0.959
ENSMUSG00000039959	5733.47	7221.05	6398.91	6451.14	Hip1	0.959
ENSMUSG00000036053	6161.45	6880.49	6295.38	6445.77	Fmnl2	0.959
ENSMUSG00000022841	6161.45	6863.17	6303.74	6442.79	Ap2m1	0.959
ENSMUSG00000039176	6434.47	6512.99	6368.58	6438.68	Polg	0.959
ENSMUSG00000037013	6303.76	6791.98	6213.81	6436.52	Ss18	0.959
ENSMUSG00000022201	6364.9	6424.48	6513.94	6434.44	Zfr	0.959
ENSMUSG00000036256	4375.74	6981.5	7944.52	6433.92	Igfbp7	0.959
ENSMUSG00000026826	6910.95	5700.07	6686.49	6432.5	Nr4a2	0.959
ENSMUSG00000068566	6455.56	6898.76	5939.83	6431.38	Myadm	0.958
ENSMUSG00000054823	6544.1	6324.43	6407.27	6425.27	Nsd3	0.958
ENSMUSG00000030123	6382.82	6299.42	6590.28	6424.17	Plxnd1	0.958
ENSMUSG00000024283	6472.42	6526.46	6269.23	6422.7	Wac	0.958
ENSMUSG00000003068	6474.53	6423.52	6321.52	6406.52	Stk11	0.958
ENSMUSG00000026965	6006.49	6621.7	6580.87	6403.02	Anapc2	0.958
ENSMUSG00000043131	6606.3	6355.21	6239.95	6400.49	Mob1a	0.958
ENSMUSG00000030787	4252.4	9359.65	5586.36	6399.47	Lyve1	0.958
ENSMUSG00000061689	6562.02	5617.33	7017.99	6399.11	Dlgap4	0.958
ENSMUSG00000026726	7044.82	6509.14	5613.55	6389.17	Cubn	0.958
ENSMUSG00000022912	5506.83	6981.5	6674.98	6387.77	Pros1	0.958
ENSMUSG00000015846	7078.55	5522.09	6493.02	6364.56	Rxra	0.958
ENSMUSG00000039671	6534.62	6507.22	6046.49	6362.77	Zmynd8	0.958
ENSMUSG00000063382	6467.15	6324.43	6288.06	6359.88	Bcl9l	0.958
ENSMUSG00000022687	7478.07	4882.34	6716.81	6359.07	Boc	0.958
ENSMUSG00000000001	6477.69	6330.2	6228.45	6345.45	Gnai3	0.958
ENSMUSG00000070544	6913.05	5937.69	6175.12	6341.95	Top1	0.958
ENSMUSG00000058690	6353.3	6394.66	6262.96	6336.97	Ccser2	0.958
ENSMUSG00000021585	6117.18	6206.1	6676.03	6333.1	Cast	0.958
ENSMUSG00000052974	3830.75	6021.39	9145.03	6332.39	Cyp2f2	0.958
ENSMUSG00000028423	6236.3	6360.99	6388.45	6328.58	Nfx1	0.958
ENSMUSG00000022479	8493.21	3903.94	6579.82	6325.66	Vdr	0.958
ENSMUSG00000037646	7226.13	5889.59	5860.35	6325.36	Vps13b	0.958
ENSMUSG00000034926	8409.93	4799.6	5765.19	6324.91	Dhcr24	0.958
ENSMUSG00000021806	5875.78	5909.79	7173.8	6319.79	Nid2	0.958
ENSMUSG00000030754	5786.18	6572.63	6582.96	6313.92	Copb1	0.958
ENSMUSG00000024360	6603.14	5864.58	6461.65	6309.79	Etf1	0.958
ENSMUSG00000032423	6726.47	6123.36	6061.13	6303.66	Syncrip	0.958
ENSMUSG00000039536	6569.4	6025.24	6314.2	6302.95	Stau1	0.958
ENSMUSG00000037519	6150.91	6617.85	6138.52	6302.43	Ppfia1	0.958
ENSMUSG00000030987	6475.59	5896.32	6525.44	6299.12	Stim1	0.958
ENSMUSG00000025862	6295.33	6450.46	6143.75	6296.51	Stag2	0.957
ENSMUSG00000037868	7592.97	4599.5	6680.21	6290.89	Egr2	0.957
ENSMUSG00000040234	5446.74	6896.84	6524.4	6289.33	Tm7sf3	0.957
ENSMUSG00000033335	5830.45	6695.77	6336.16	6287.46	Dnm2	0.957
ENSMUSG00000038619	6278.46	6229.19	6345.57	6284.41	Ensa	0.957
ENSMUSG00000061589	6811.86	6072.38	5950.28	6278.17	Dot1l	0.957
ENSMUSG00000035967	6393.36	5804.93	6596.55	6264.95	Ints6l	0.957
ENSMUSG00000032458	5654.41	6714.05	6403.09	6257.18	Copb2	0.957
ENSMUSG00000058793	5578.51	6732.33	6439.69	6250.18	Cds2	0.957
ENSMUSG00000032076	6325.9	6529.34	5891.72	6248.99	Cadm1	0.957
ENSMUSG00000026639	8308.74	4140.61	6290.15	6246.5	Lamb3	0.957
ENSMUSG00000029512	6817.13	5836.68	6083.09	6245.63	Ulk1	0.957
ENSMUSG00000030341	5975.92	5786.65	6956.29	6239.62	Tnfrsf1a	0.957
ENSMUSG00000024960	6501.94	6003.11	6212.76	6239.27	Plcb3	0.957
ENSMUSG00000006369	4487.48	5672.17	8544.77	6234.81	Fbln1	0.957
ENSMUSG00000015749	6084.5	6694.81	5921	6233.44	Anp32e	0.957
ENSMUSG00000029686	6216.27	6164.73	6318.38	6233.13	Cul1	0.957
ENSMUSG00000031299	6356.47	6246.5	6066.36	6223.11	Pdha1	0.957
ENSMUSG00000034135	5801.99	6400.43	6450.15	6217.52	Sik3	0.957
ENSMUSG00000038127	6368.06	5849.18	6426.1	6214.45	Ccdc50	0.957
ENSMUSG00000024474	5868.4	6573.6	6193.94	6211.98	Ik	0.957
ENSMUSG00000019471	6010.71	6711.17	5909.5	6210.46	Cdc37	0.957
ENSMUSG00000012405	6209.94	6269.59	6146.88	6208.81	Rpl15	0.957
ENSMUSG00000026116	6260.54	6081.03	6282.83	6208.13	Tmem131	0.957
ENSMUSG00000030180	6506.16	6062.75	6047.54	6205.48	Kdm5a	0.957
ENSMUSG00000030557	6019.14	6161.84	6430.28	6203.76	Mef2a	0.957
ENSMUSG00000024098	5281.24	6168.58	7149.75	6199.86	Twsg1	0.957
ENSMUSG00000022817	4222.89	6329.24	8040.73	6197.62	Itgb5	0.957
ENSMUSG00000041607	5953.79	4946.79	7660.07	6186.88	Mbp	0.957
ENSMUSG00000000826	6413.39	6187.82	5932.51	6177.91	Dnajc5	0.957
ENSMUSG00000028793	6773.91	5325.83	6416.68	6172.14	Rnf19b	0.957
ENSMUSG00000027678	6412.34	5928.07	6173.03	6171.14	Ncoa3	0.956
ENSMUSG00000028020	5924.27	7429.81	5152.38	6168.82	Glrb	0.956
ENSMUSG00000032501	6724.36	5119	6655.11	6166.16	Trib1	0.956
ENSMUSG00000008206	6566.24	6030.05	5899.04	6165.11	Cers4	0.956
ENSMUSG00000057522	5578.51	6122.4	6784.79	6161.9	Spop	0.956
ENSMUSG00000038648	5792.5	6463.92	6220.09	6158.84	Creb3l2	0.956
ENSMUSG00000020644	6988.95	6056.98	5429.5	6158.48	Id2	0.956
ENSMUSG00000020902	3531.37	7494.27	7445.7	6157.11	Ntn1	0.956
ENSMUSG00000032633	6319.57	5947.31	6203.35	6156.75	Flcn	0.956
ENSMUSG00000001995	6203.62	6037.74	6226.36	6155.91	Sipa1l2	0.956
ENSMUSG00000019899	5026.14	6454.3	6985.57	6155.34	Lama2	0.956
ENSMUSG00000034163	7388.47	5363.35	5694.08	6148.63	Zfc3h1	0.956
ENSMUSG00000061665	6163.56	6353.29	5923.09	6146.65	Cd2ap	0.956
ENSMUSG00000021143	5735.58	6536.08	6167.8	6146.48	Pacs2	0.956
ENSMUSG00000024789	6176.21	6066.6	6196.03	6146.28	Jak2	0.956
ENSMUSG00000041935	6472.42	6006.96	5942.96	6140.78	AW549877	0.956
ENSMUSG00000022801	6134.04	6047.36	6239.95	6140.45	Lrch3	0.956
ENSMUSG00000046897	6079.23	6064.68	6261.91	6135.27	Zfp740	0.956
ENSMUSG00000024096	6255.27	5777.03	6364.4	6132.23	Ralbp1	0.956
ENSMUSG00000038766	6391.25	5879.97	6121.79	6131	Gabpb2	0.956
ENSMUSG00000029313	6874.05	5243.1	6275.51	6130.89	Aff1	0.956
ENSMUSG00000016256	5336.06	7398.06	5638.65	6124.26	Ctsz	0.956
ENSMUSG00000035152	5827.29	6504.33	6040.22	6123.95	Ap2b1	0.956
ENSMUSG00000048756	6497.72	5501.89	6365.44	6121.68	Foxo3	0.956
ENSMUSG00000030846	6378.6	5899.21	6077.86	6118.56	Tial1	0.956
ENSMUSG00000057637	6492.45	6132.02	5730.68	6118.38	Prdm2	0.956
ENSMUSG00000062115	5939.03	6438.91	5963.88	6113.94	Rai1	0.956
ENSMUSG00000027111	6726.47	5523.05	6090.41	6113.31	Itga6	0.956
ENSMUSG00000041130	6298.49	5992.53	6037.08	6109.37	Zfp598	0.956
ENSMUSG00000024462	6010.71	6010.8	6303.74	6108.42	Gabbr1	0.956
ENSMUSG00000006301	6451.34	5568.27	6299.56	6106.39	Tmbim1	0.956
ENSMUSG00000024769	7666.76	4479.24	6173.03	6106.34	Cdc42bpg	0.955
ENSMUSG00000041598	5970.65	6558.2	5785.06	6104.64	Cdc42ep4	0.955
ENSMUSG00000034621	6356.47	6007.92	5946.1	6103.5	Gpatch8	0.955
ENSMUSG00000022587	4278.76	6587.06	7442.56	6102.79	Ly6e	0.955
ENSMUSG00000044308	6364.9	6164.73	5771.46	6100.36	Ubr3	0.955
ENSMUSG00000027404	5900.02	6675.57	5725.45	6100.35	Snrpb	0.955
ENSMUSG00000019256	6248.94	6384.08	5648.06	6093.69	Ahr	0.955
ENSMUSG00000004897	6316.41	5952.12	6006.75	6091.76	Hdgf	0.955
ENSMUSG00000033671	6389.15	6107.01	5770.42	6088.86	Cep350	0.955
ENSMUSG00000040850	6114.01	6055.06	6093.55	6087.54	Psme4	0.955
ENSMUSG00000061755	6272.14	6271.52	5718.13	6087.26	Bod1l	0.955
ENSMUSG00000019254	6009.65	5965.59	6282.83	6086.02	Ppp1r12c	0.955
ENSMUSG00000021215	7605.62	4289.72	6354.99	6083.44	Net1	0.955
ENSMUSG00000024913	5725.04	6545.7	5978.52	6083.08	Lrp5	0.955
ENSMUSG00000041354	5526.86	6540.89	6181.39	6083.05	Rgl2	0.955
ENSMUSG00000004364	6189.91	6101.24	5956.56	6082.57	Cul3	0.955
ENSMUSG00000038776	6049.71	5934.8	6247.27	6077.26	Ephx1	0.955
ENSMUSG00000031353	6138.26	6536.08	5551.85	6075.4	Rbbp7	0.955
ENSMUSG00000020422	6489.29	5660.62	6074.73	6074.88	Tns3	0.955
ENSMUSG00000040339	5686.03	5477.84	7053.54	6072.47	Fam102b	0.955
ENSMUSG00000032702	7212.43	4664.92	6323.61	6066.99	Kank1	0.955
ENSMUSG00000003437	6205.73	5835.71	6153.16	6064.87	Paf1	0.955
ENSMUSG00000036822	6260.54	6054.1	5869.76	6061.47	Topors	0.955
ENSMUSG00000029202	6075.01	6230.15	5870.81	6058.66	Pds5a	0.955
ENSMUSG00000040385	5889.48	6679.42	5594.73	6054.54	Ppp1ca	0.955
ENSMUSG00000030007	6082.39	6369.64	5696.17	6049.4	Cct7	0.955
ENSMUSG00000024695	6080.28	6217.64	5847.8	6048.58	Zfp91	0.955
ENSMUSG00000029148	5970.65	6103.16	6061.13	6044.98	Nrbp1	0.955
ENSMUSG00000041720	5827.29	6328.28	5971.2	6042.25	Pi4ka	0.955
ENSMUSG00000068882	5848.37	6256.12	6015.12	6039.87	Ssb	0.955
ENSMUSG00000094483	6586.27	5687.56	5833.16	6035.66	Purb	0.955
ENSMUSG00000057863	6251.05	6360.02	5494.34	6035.14	Rpl36	0.954
ENSMUSG00000053522	8245.49	3773.11	6067.41	6028.67	Lgals7	0.954
ENSMUSG00000041570	6474.53	5899.21	5705.58	6026.44	Camsap2	0.954
ENSMUSG00000031485	6778.12	5299.86	5994.2	6024.06	Plpbp	0.954
ENSMUSG00000031166	6254.22	5627.91	6186.62	6022.92	Wdr13	0.954
ENSMUSG00000043336	6546.21	5529.79	5981.66	6019.22	Filip1l	0.954
ENSMUSG00000032336	5676.55	6047.36	6326.75	6016.89	Nptn	0.954
ENSMUSG00000018171	5857.86	6056.98	6127.01	6013.95	Vmp1	0.954
ENSMUSG00000046330	5934.81	6141.64	5964.92	6013.79	Rpl37a	0.954
ENSMUSG00000029287	5304.43	5778.95	6944.79	6009.39	Tgfbr3	0.954
ENSMUSG00000048000	6076.07	6032.93	5902.18	6003.73	Gigyf2	0.954
ENSMUSG00000022536	5964.33	6168.58	5874.99	6002.63	Glyr1	0.954
ENSMUSG00000026970	5806.21	6509.14	5689.89	6001.75	Rbms1	0.954
ENSMUSG00000096210	5348.71	6895.88	5733.81	5992.8	H1f0	0.954
ENSMUSG00000020717	3730.6	7495.23	6750.28	5992.04	Pecam1	0.954
ENSMUSG00000035969	5696.58	5991.56	6285.97	5991.37	Rusc2	0.954
ENSMUSG00000022346	6317.46	5286.39	6367.53	5990.46	Myc	0.954
ENSMUSG00000006373	5701.85	6055.06	6203.35	5986.75	Pgrmc1	0.954
ENSMUSG00000026626	5115.74	7148.89	5678.39	5981.01	Ppp2r5a	0.954
ENSMUSG00000013629	5877.89	6355.21	5699.3	5977.47	Cad	0.954
ENSMUSG00000040524	6044.44	6206.1	5679.44	5976.66	Zfp609	0.954
ENSMUSG00000031930	6242.62	5539.41	6132.24	5971.42	Wwp2	0.954
ENSMUSG00000015709	5712.39	6687.12	5503.75	5967.75	Arnt2	0.954
ENSMUSG00000030527	5943.24	6585.14	5367.8	5965.4	Crtc3	0.954
ENSMUSG00000019998	5635.44	6516.84	5734.86	5962.38	Stx7	0.954
ENSMUSG00000063550	6624.22	5589.43	5670.02	5961.23	Nup98	0.954
ENSMUSG00000019539	4063.71	6293.64	7524.13	5960.49	Rcn3	0.954
ENSMUSG00000026457	5872.62	6087.77	5908.45	5956.28	Adipor1	0.954
ENSMUSG00000035891	5956.95	6752.54	5154.47	5954.65	Cerk	0.954
ENSMUSG00000042507	6049.71	5528.82	6284.92	5954.49	Elmsan1	0.954
ENSMUSG00000036990	6180.43	5863.61	5803.88	5949.31	Otud4	0.954
ENSMUSG00000031696	5804.1	6481.24	5559.17	5948.17	Vps35	0.953
ENSMUSG00000040356	5840.99	5927.11	6073.68	5947.26	Skiv2l	0.953
ENSMUSG00000030275	5910.57	6100.27	5826.89	5945.91	Etnk1	0.953
ENSMUSG00000030082	5544.78	6028.12	6259.82	5944.24	Sec61a1	0.953
ENSMUSG00000019102	5185.32	5229.63	7417.46	5944.14	Aldh3a1	0.953
ENSMUSG00000033444	5943.24	6031.01	5856.17	5943.47	Specc1l	0.953
ENSMUSG00000032116	5133.66	6455.27	6221.13	5936.69	Stt3a	0.953
ENSMUSG00000024587	5845.21	6162.81	5800.74	5936.25	Nars	0.953
ENSMUSG00000020114	6142.48	6048.32	5616.69	5935.83	Cand1	0.953
ENSMUSG00000021244	6062.36	5817.44	5919.96	5933.25	Ylpm1	0.953
ENSMUSG00000023852	6259.49	5792.42	5746.36	5932.76	Chd1	0.953
ENSMUSG00000004530	5919	6592.84	5267.41	5926.42	Coro1c	0.953
ENSMUSG00000020290	6012.82	6192.63	5566.5	5923.98	Xpo1	0.953
ENSMUSG00000036270	5876.83	6074.3	5808.06	5919.73	Edc4	0.953
ENSMUSG00000026020	6506.16	5753.94	5497.48	5919.19	Nop58	0.953
ENSMUSG00000031391	5537.4	5338.34	6879.95	5918.56	L1cam	0.953
ENSMUSG00000027677	6426.04	5825.13	5501.66	5917.61	Ttc14	0.953
ENSMUSG00000025404	6067.63	5791.46	5889.63	5916.24	R3hdm2	0.953
ENSMUSG00000027878	5731.36	6160.88	5853.03	5915.09	Notch2	0.953
ENSMUSG00000033191	3629.41	8571.75	5537.21	5912.79	Tie1	0.953
ENSMUSG00000005873	5764.04	5696.22	6274.46	5911.57	Reep5	0.953
ENSMUSG00000029426	6125.61	5590.39	6007.8	5907.93	Scarb2	0.953
ENSMUSG00000001415	5797.77	6092.58	5831.07	5907.14	Smg5	0.953
ENSMUSG00000001288	6454.5	5331.61	5933.55	5906.55	Rarg	0.953
ENSMUSG00000027007	6905.67	5056.46	5745.32	5902.49	Ssfa2	0.953
ENSMUSG00000033955	5790.39	5836.68	6061.13	5896.07	Tnks1bp1	0.953
ENSMUSG00000037902	5695.52	6369.64	5619.83	5895	Sirpa	0.953
ENSMUSG00000056692	5750.34	5879.01	6049.63	5892.99	D17Wsu92e	0.953
ENSMUSG00000038406	5912.67	6021.39	5740.09	5891.38	Scaf1	0.953
ENSMUSG00000026825	5243.29	5575.96	6844.39	5887.88	Dnm1	0.953
ENSMUSG00000019850	6713.82	4525.42	6420.87	5886.7	Tnfaip3	0.953
ENSMUSG00000108218	3771.71	8069.56	5808.06	5883.11	NA	0.953
ENSMUSG00000047153	6241.57	5435.51	5949.24	5875.44	Khnyn	0.952
ENSMUSG00000028032	5730.31	6317.69	5574.86	5874.29	Papss1	0.952
ENSMUSG00000015522	5651.25	5833.79	6116.56	5867.2	Arnt	0.952
ENSMUSG00000041075	7090.15	5037.22	5472.38	5866.58	Fzd7	0.952
ENSMUSG00000038976	5538.45	6178.2	5870.81	5862.49	Ppp1r9b	0.952
ENSMUSG00000033237	6037.06	5691.41	5848.85	5859.11	Arid2	0.952
ENSMUSG00000022568	6093.99	5671.21	5796.56	5853.92	Scrib	0.952
ENSMUSG00000035770	6296.38	5799.16	5464.01	5853.18	Dync1li2	0.952
ENSMUSG00000020894	6259.49	5614.45	5682.57	5852.17	Vamp2	0.952
ENSMUSG00000006920	5677.6	5993.49	5849.89	5840.33	Ezh1	0.952
ENSMUSG00000022387	6194.13	5778.95	5546.63	5839.9	Brd1	0.952
ENSMUSG00000052040	5564.81	5432.62	6516.03	5837.82	Klf13	0.952
ENSMUSG00000023046	3174.02	5753.94	8578.24	5835.4	Igfbp6	0.952
ENSMUSG00000050310	6099.26	5471.1	5933.55	5834.64	Rictor	0.952
ENSMUSG00000038991	4617.14	6182.05	6703.22	5834.13	Txndc5	0.952
ENSMUSG00000035284	6259.49	5861.69	5373.03	5831.4	Vps13c	0.952
ENSMUSG00000025544	5336.06	6159.92	5995.25	5830.41	Tm9sf2	0.952
ENSMUSG00000041168	5740.85	6178.2	5557.08	5825.38	Lonp1	0.952
ENSMUSG00000027067	5634.38	6170.5	5667.93	5824.27	Ssrp1	0.952
ENSMUSG00000008855	5858.91	5872.27	5740.09	5823.76	Hdac5	0.952
ENSMUSG00000022957	5590.11	5980.98	5896.95	5822.68	Itsn1	0.952
ENSMUSG00000025579	5281.24	6025.24	6159.43	5821.97	Gaa	0.952
ENSMUSG00000025159	5765.09	5910.75	5784.01	5819.95	Mms19	0.952
ENSMUSG00000020841	5717.66	5824.17	5913.68	5818.5	Cpd	0.952
ENSMUSG00000041408	6041.28	5829.94	5564.4	5811.87	Wapl	0.952
ENSMUSG00000053110	6290.06	5367.2	5765.19	5807.48	Yap1	0.952
ENSMUSG00000034902	5199.02	6634.2	5585.32	5806.18	Pip5k1c	0.952
ENSMUSG00000025409	5869.45	5838.6	5709.76	5805.94	Mbd6	0.952
ENSMUSG00000040865	6137.21	5643.31	5635.51	5805.34	Ino80d	0.952
ENSMUSG00000068039	5978.03	6058.91	5375.12	5804.02	Tcp1	0.952
ENSMUSG00000072501	5725.04	5929.99	5747.41	5800.81	Phf20l1	0.952
ENSMUSG00000039087	6270.03	5768.37	5361.53	5799.98	Rreb1	0.951
ENSMUSG00000038502	5944.3	5840.52	5597.87	5794.23	Ptov1	0.951
ENSMUSG00000018583	6005.44	5755.87	5618.78	5793.36	G3bp1	0.951
ENSMUSG00000029110	5840.99	6058.91	5478.65	5792.85	Rnf4	0.951
ENSMUSG00000019802	5522.64	5921.34	5930.41	5791.46	Sec63	0.951
ENSMUSG00000037470	5552.16	6209.95	5591.59	5784.57	Uggt1	0.951
ENSMUSG00000032560	5926.38	5881.89	5543.49	5783.92	Dnajc13	0.951
ENSMUSG00000034377	5740.85	5932.88	5676.3	5783.34	Tulp4	0.951
ENSMUSG00000019943	5250.67	6086.81	5993.16	5776.88	Atp2b1	0.951
ENSMUSG00000001052	5692.36	5672.17	5965.97	5776.83	Sec24b	0.951
ENSMUSG00000027466	5365.58	6118.55	5841.53	5775.22	Rbck1	0.951
ENSMUSG00000052681	5709.22	5680.83	5894.86	5761.64	Rap1b	0.951
ENSMUSG00000038914	5967.49	6293.64	5021.66	5760.93	Dido1	0.951
ENSMUSG00000037410	6034.95	5745.28	5501.66	5760.63	Tbc1d2b	0.951
ENSMUSG00000024835	5723.98	6273.44	5281.01	5759.48	Coro1b	0.951
ENSMUSG00000021959	5681.82	6019.46	5576.95	5759.41	Lats2	0.951
ENSMUSG00000022150	5481.53	6051.21	5729.63	5754.12	Dab2	0.951
ENSMUSG00000022747	5401.42	7025.75	4819.83	5749	St3gal6	0.951
ENSMUSG00000027288	5816.75	5818.4	5599.96	5745.03	Zfp106	0.951
ENSMUSG00000058301	5958	5693.33	5582.18	5744.51	Upf1	0.951
ENSMUSG00000110206	7711.04	4524.46	4993.43	5742.97	Flt3l	0.951
ENSMUSG00000020196	5713.44	5914.6	5580.09	5736.04	Cabin1	0.951
ENSMUSG00000021027	5906.35	5489.38	5811.2	5735.64	Ralgapa1	0.951
ENSMUSG00000020674	5241.19	5610.6	6348.71	5733.5	Pxdn	0.951
ENSMUSG00000067851	6026.52	5639.46	5526.76	5730.91	Arfgef1	0.951
ENSMUSG00000024104	5668.11	5924.22	5595.78	5729.37	Washc2	0.951
ENSMUSG00000020361	5805.15	5774.14	5582.18	5720.49	Hspa4	0.951
ENSMUSG00000038725	4130.12	8049.36	4975.65	5718.38	Pkhd1l1	0.951
ENSMUSG00000028161	5632.27	5851.11	5660.61	5714.66	Ppp3ca	0.951
ENSMUSG00000037933	5933.76	5248.87	5957.6	5713.41	Bicd2	0.951
ENSMUSG00000109336	5876.83	5322.95	5866.62	5688.8	Samd4b	0.951
ENSMUSG00000033253	6033.9	5361.43	5659.57	5684.97	Szt2	0.95
ENSMUSG00000058587	5369.79	5980.98	5691.98	5680.92	Tmod3	0.95
ENSMUSG00000030084	6211	5367.2	5459.83	5679.34	Plxna1	0.95
ENSMUSG00000057329	5734.52	6057.94	5239.18	5677.22	Bcl2	0.95
ENSMUSG00000049550	5635.44	5209.43	6186.62	5677.16	Clip1	0.95
ENSMUSG00000020349	5728.2	5630.8	5659.57	5672.86	Ppp2ca	0.95
ENSMUSG00000026028	5849.43	6005.99	5152.38	5669.27	Trak2	0.95
ENSMUSG00000022895	5608.03	4917.93	6481.52	5669.16	Ets2	0.95
ENSMUSG00000053675	7225.08	3851.03	5926.23	5667.45	Tgm5	0.95
ENSMUSG00000024240	6087.66	5589.43	5309.24	5662.11	Epc1	0.95
ENSMUSG00000066037	5540.56	5851.11	5573.82	5655.16	Hnrnpr	0.95
ENSMUSG00000057230	5530.02	5802.04	5628.19	5653.42	Aak1	0.95
ENSMUSG00000051510	6150.91	5186.34	5602.05	5646.43	Mafg	0.95
ENSMUSG00000044674	5296	5434.54	6208.58	5646.38	Fzd1	0.95
ENSMUSG00000031154	5518.43	5499.96	5908.45	5642.28	Otud5	0.95
ENSMUSG00000034573	5847.32	5062.24	6011.98	5640.51	Ptpn13	0.95
ENSMUSG00000055302	5525.8	5853.03	5536.17	5638.33	Mrfap1	0.95
ENSMUSG00000009376	5907.4	6473.54	4523.89	5634.95	Met	0.95
ENSMUSG00000039621	5519.48	6458.15	4918.13	5631.92	Prex1	0.95
ENSMUSG00000019961	5728.2	5687.56	5479.7	5631.82	Tmpo	0.95
ENSMUSG00000026083	5440.42	5782.8	5671.07	5631.43	Eif5b	0.95
ENSMUSG00000021377	5809.37	5683.71	5398.13	5630.4	Dek	0.95
ENSMUSG00000020156	5344.49	5900.17	5627.15	5623.94	Mum1	0.95
ENSMUSG00000028862	4628.73	5024.72	7213.54	5622.33	Map3k6	0.95
ENSMUSG00000043822	6377.55	4363.8	6119.69	5620.35	Adamtsl5	0.95
ENSMUSG00000001416	5683.93	5898.25	5276.82	5619.67	Cct3	0.95
ENSMUSG00000029055	7079.61	3209.35	6564.13	5617.7	Plch2	0.95
ENSMUSG00000027593	5619.62	5686.6	5543.49	5616.57	Raly	0.95
ENSMUSG00000041685	5505.78	5466.29	5836.3	5602.79	Fcho2	0.95
ENSMUSG00000049076	5814.64	5563.46	5398.13	5592.08	Acap2	0.95
ENSMUSG00000052957	5954.84	4836.16	5981.66	5590.88	Gas1	0.95
ENSMUSG00000024290	5774.58	5504.77	5490.16	5589.84	Rock1	0.949
ENSMUSG00000027109	5696.58	5477.84	5594.73	5589.71	Sp3	0.949
ENSMUSG00000056050	5306.54	5520.17	5936.69	5587.8	Mia3	0.949
ENSMUSG00000005683	5880	5754.9	5123.1	5586	Cs	0.949
ENSMUSG00000038762	5408.79	5919.41	5426.37	5584.86	Abcf1	0.949
ENSMUSG00000034820	5594.32	5550.95	5602.05	5582.44	Cpsf7	0.949
ENSMUSG00000038369	5508.94	5758.75	5469.24	5578.98	Ncoa6	0.949
ENSMUSG00000060601	5425.66	5633.69	5670.02	5576.46	Nr1h2	0.949
ENSMUSG00000022812	5639.65	5745.28	5343.75	5576.23	Gsk3b	0.949
ENSMUSG00000031065	5680.76	5338.34	5706.62	5575.24	Cdk16	0.949
ENSMUSG00000020484	5259.11	5568.27	5895.9	5574.43	Xbp1	0.949
ENSMUSG00000024070	5346.6	6114.7	5255.91	5572.4	Prkd3	0.949
ENSMUSG00000004099	5823.07	5585.58	5306.1	5571.59	Dnmt1	0.949
ENSMUSG00000005371	5710.28	5445.13	5546.63	5567.34	Fbxo11	0.949
ENSMUSG00000034832	6336.44	5111.3	5251.73	5566.49	Tet3	0.949
ENSMUSG00000055320	5862.08	5764.52	5069.77	5565.46	Tead1	0.949
ENSMUSG00000021069	5266.49	6244.58	5177.48	5562.85	Pygl	0.949
ENSMUSG00000039205	5409.85	5739.51	5536.17	5561.84	Ciz1	0.949
ENSMUSG00000003420	4075.31	6353.29	6228.45	5552.35	Fcgrt	0.949
ENSMUSG00000047714	4740.47	6334.05	5567.54	5547.35	Ppp1r2	0.949
ENSMUSG00000007670	5822.02	5333.53	5470.29	5541.95	Khsrp	0.949
ENSMUSG00000032612	5059.87	5845.33	5719.17	5541.46	Usp4	0.949
ENSMUSG00000060671	5235.92	5343.15	6010.94	5530	Atp8b2	0.949
ENSMUSG00000032604	5561.65	5670.24	5346.89	5526.26	Qars	0.949
ENSMUSG00000021365	6101.37	4893.88	5572.77	5522.67	Nedd9	0.949
ENSMUSG00000039148	5341.33	5764.52	5461.92	5522.59	Sart1	0.949
ENSMUSG00000023952	5595.38	5261.38	5708.72	5521.82	Gtpbp2	0.949
ENSMUSG00000037894	5825.18	5368.16	5368.85	5520.73	H2afz	0.949
ENSMUSG00000036402	5368.74	6092.58	5096.96	5519.42	Gng12	0.949
ENSMUSG00000018339	3870.8	6044.48	6630.02	5515.1	Gpx3	0.949
ENSMUSG00000020747	5136.83	5834.75	5552.9	5508.16	Tmem94	0.949
ENSMUSG00000008475	5499.45	5831.87	5191.07	5507.46	Arpc5	0.948
ENSMUSG00000019428	5446.74	5551.91	5522.57	5507.08	Fkbp8	0.948
ENSMUSG00000002107	5431.99	5716.42	5370.94	5506.45	Celf2	0.948
ENSMUSG00000028618	5141.04	5516.32	5858.26	5505.21	Tmem59	0.948
ENSMUSG00000056427	3303.68	5504.77	7706.09	5504.85	Slit3	0.948
ENSMUSG00000028822	4679.33	5679.86	6145.84	5501.68	Tmem50a	0.948
ENSMUSG00000028476	4319.87	5349.89	6824.53	5498.09	Reck	0.948
ENSMUSG00000024758	5505.78	5431.66	5543.49	5493.64	Rtn3	0.948
ENSMUSG00000007411	5286.51	5749.13	5441.01	5492.22	Mark3	0.948
ENSMUSG00000032812	4839.56	5316.21	6320.48	5492.08	Arap1	0.948
ENSMUSG00000025492	4316.71	5995.41	6154.2	5488.77	Ifitm3	0.948
ENSMUSG00000021823	6423.93	4622.59	5414.86	5487.13	Vcl	0.948
ENSMUSG00000040479	4612.92	6480.28	5366.76	5486.65	Dgkz	0.948
ENSMUSG00000024193	5402.47	5342.19	5708.72	5484.46	Phf1	0.948
ENSMUSG00000002625	5162.13	5405.68	5881.26	5483.02	Akap8l	0.948
ENSMUSG00000062098	4585.51	6367.72	5489.11	5480.78	Btbd3	0.948
ENSMUSG00000040021	5838.88	5573.08	5028.98	5480.32	Lats1	0.948
ENSMUSG00000034973	5572.19	5315.25	5552.9	5480.11	Dopey1	0.948
ENSMUSG00000042323	5606.97	5421.08	5406.5	5478.18	Pbrm1	0.948
ENSMUSG00000028333	5494.18	5406.65	5530.94	5477.26	Anp32b	0.948
ENSMUSG00000007458	5191.64	5965.59	5240.22	5465.82	M6pr	0.948
ENSMUSG00000034928	5663.9	5417.23	5310.29	5463.8	Rnf44	0.948
ENSMUSG00000020149	5222.21	5460.52	5702.44	5461.72	Rab1a	0.948
ENSMUSG00000029247	5689.2	5661.59	5034.21	5461.66	Paics	0.948
ENSMUSG00000032777	5512.1	5432.62	5436.82	5460.51	Gtf3c1	0.948
ENSMUSG00000006169	5206.4	5685.64	5482.84	5458.29	Clint1	0.948
ENSMUSG00000028962	5303.38	5531.71	5531.99	5455.69	Slc4a2	0.948
ENSMUSG00000041313	5662.84	6004.07	4695.39	5454.1	Slc7a1	0.948
ENSMUSG00000013593	5342.38	5744.32	5254.86	5447.19	Ndufs2	0.948
ENSMUSG00000020300	5809.37	5524.01	5008.07	5447.15	Cpeb4	0.948
ENSMUSG00000042548	5614.35	5519.2	5203.62	5445.73	Asxl1	0.948
ENSMUSG00000029673	5483.64	5396.06	5454.6	5444.77	Auts2	0.947
ENSMUSG00000056167	5300.22	5286.39	5743.23	5443.28	Cnot10	0.947
ENSMUSG00000018846	6039.17	5429.73	4852.25	5440.39	Pank3	0.947
ENSMUSG00000027363	5167.4	5773.18	5363.62	5434.73	Usp8	0.947
ENSMUSG00000039286	5049.33	5266.19	5981.66	5432.39	Fndc3b	0.947
ENSMUSG00000047731	4949.19	5728.93	5618.78	5432.3	Wbp1l	0.947
ENSMUSG00000030737	4113.26	6381.19	5799.7	5431.38	Slco2b1	0.947
ENSMUSG00000002222	5856.8	5208.47	5227.67	5430.98	Rmnd5a	0.947
ENSMUSG00000024974	5472.04	5593.28	5222.45	5429.26	Smc3	0.947
ENSMUSG00000039068	5630.16	5612.52	5036.3	5426.33	Zzz3	0.947
ENSMUSG00000020593	5399.31	6237.85	4631.6	5422.92	Lpin1	0.947
ENSMUSG00000017765	5503.67	5074.74	5679.44	5419.28	Slc12a4	0.947
ENSMUSG00000007836	5795.66	5718.35	4736.17	5416.73	Hnrnpa0	0.947
ENSMUSG00000038025	5426.72	5228.67	5590.55	5415.31	Phf2	0.947
ENSMUSG00000032178	5527.91	5355.66	5361.53	5415.03	Ilf3	0.947
ENSMUSG00000005397	4440.04	5896.32	5892.77	5409.71	Nid1	0.947
ENSMUSG00000028309	5249.62	5615.41	5362.57	5409.2	Rnf20	0.947
ENSMUSG00000038611	5165.29	5518.24	5520.48	5401.34	Phrf1	0.947
ENSMUSG00000022324	5190.59	4389.77	6617.47	5399.28	Matn2	0.947
ENSMUSG00000041815	5395.09	5519.2	5281.01	5398.43	Poldip3	0.947
ENSMUSG00000039585	5764.04	5070.9	5344.8	5393.24	Myo9a	0.947
ENSMUSG00000020152	5347.65	5687.56	5144.01	5393.08	Actr2	0.947
ENSMUSG00000057335	5309.71	5550.95	5313.43	5391.36	Cep170	0.947
ENSMUSG00000036275	4896.48	5550.95	5719.17	5388.87	9530068E07Rik	0.947
ENSMUSG00000063015	5701.85	5024.72	5428.46	5385.01	Ccni	0.947
ENSMUSG00000020642	5202.18	6310	4642.06	5384.75	Rnf144a	0.947
ENSMUSG00000028757	4618.19	6009.84	5522.57	5383.54	Ddost	0.947
ENSMUSG00000030770	4645.6	5694.29	5794.47	5378.12	Parva	0.947
ENSMUSG00000028434	5351.87	4906.39	5861.39	5373.22	Epb41l4b	0.947
ENSMUSG00000023055	5242.24	5408.57	5465.06	5371.96	Calcoco1	0.947
ENSMUSG00000032232	6062.36	4359.95	5688.85	5370.39	Cgnl1	0.947
ENSMUSG00000020451	6010.71	4447.5	5645.97	5368.06	Limk2	0.947
ENSMUSG00000024006	5402.47	5302.75	5393.95	5366.39	Stk38	0.946
ENSMUSG00000004056	5340.28	5242.14	5508.98	5363.8	Akt2	0.946
ENSMUSG00000034422	5267.54	5165.17	5626.1	5352.94	Parp14	0.946
ENSMUSG00000027575	5416.17	4940.06	5690.94	5349.06	Arfgap1	0.946
ENSMUSG00000010110	5268.59	5231.56	5546.63	5348.93	Stx5a	0.946
ENSMUSG00000006304	5307.6	5641.38	5095.91	5348.3	Arpc2	0.946
ENSMUSG00000058756	4931.27	5378.75	5721.27	5343.76	Thra	0.946
ENSMUSG00000037475	5409.85	5208.47	5411.72	5343.35	Thoc2	0.946
ENSMUSG00000052727	5399.31	4941.98	5687.8	5343.03	Map1b	0.946
ENSMUSG00000035992	5670.22	5083.4	5274.73	5342.79	Fnip1	0.946
ENSMUSG00000020362	5463.61	5437.43	5126.24	5342.43	Cnot6	0.946
ENSMUSG00000079641	5539.51	5154.59	5331.2	5341.77	Rpl39	0.946
ENSMUSG00000005621	5325.52	5351.81	5332.25	5336.53	Zfp592	0.946
ENSMUSG00000024900	5111.53	5588.47	5301.92	5333.97	Cpt1a	0.946
ENSMUSG00000074934	6433.42	3553.76	6013.03	5333.4	Grem1	0.946
ENSMUSG00000023994	5403.52	5372.97	5223.49	5333.33	Nfya	0.946
ENSMUSG00000027276	5593.27	4530.23	5874.99	5332.83	Jag1	0.946
ENSMUSG00000027665	5511.05	5486.49	4998.66	5332.07	Pik3ca	0.946
ENSMUSG00000029826	5532.13	5199.81	5262.18	5331.37	Zc3hav1	0.946
ENSMUSG00000005514	4891.21	5228.67	5873.94	5331.27	Por	0.946
ENSMUSG00000052296	5405.63	5315.25	5270.55	5330.48	Ppp6r1	0.946
ENSMUSG00000042046	5609.08	5397.99	4982.97	5330.01	Dstyk	0.946
ENSMUSG00000029869	6634.76	3793.31	5552.9	5326.99	Ephb6	0.946
ENSMUSG00000035248	5307.6	5406.65	5266.37	5326.87	Zcchc6	0.946
ENSMUSG00000027351	5358.2	5574.04	5036.3	5322.85	Spred1	0.946
ENSMUSG00000002524	5092.55	5644.27	5224.54	5320.45	Puf60	0.946
ENSMUSG00000021171	5228.54	5324.87	5402.31	5318.57	Esyt2	0.946
ENSMUSG00000028552	5260.16	5389.33	5306.1	5318.53	Eps15	0.946
ENSMUSG00000021188	5518.43	5159.4	5274.73	5317.52	Trip11	0.946
ENSMUSG00000026223	4415.79	5528.82	6007.8	5317.47	Itm2c	0.946
ENSMUSG00000003119	5579.57	5473.99	4885.72	5313.09	Cdk12	0.946
ENSMUSG00000018412	5399.31	5199.81	5314.47	5304.53	Kansl1	0.945
ENSMUSG00000043323	5283.35	5568.27	5059.31	5303.64	Fbrsl1	0.945
ENSMUSG00000024735	5216.94	5731.81	4961.01	5303.25	Prpf19	0.945
ENSMUSG00000029647	5619.62	4858.28	5414.86	5297.59	Pan3	0.945
ENSMUSG00000038538	5877.89	4866.94	5142.97	5295.93	Ubn2	0.945
ENSMUSG00000028756	5243.29	5339.3	5300.88	5294.49	Pink1	0.945
ENSMUSG00000048264	5493.13	5807.82	4575.13	5292.02	Dip2c	0.945
ENSMUSG00000041375	5293.89	5239.25	5329.11	5287.42	Ccdc9	0.945
ENSMUSG00000026640	5738.74	4793.83	5327.02	5286.53	Plxna2	0.945
ENSMUSG00000028266	5355.03	6023.31	4481.01	5286.45	Lmo4	0.945
ENSMUSG00000006299	5433.04	5100.72	5323.88	5285.88	Aamp	0.945
ENSMUSG00000002102	5017.71	5684.67	5153.43	5285.27	Psmc3	0.945
ENSMUSG00000002020	5956.95	4102.12	5796.56	5285.21	Ltbp2	0.945
ENSMUSG00000031751	5010.33	5416.27	5427.41	5284.67	Amfr	0.945
ENSMUSG00000015501	5611.19	4892.92	5347.93	5284.01	Hivep2	0.945
ENSMUSG00000025225	5656.52	4490.79	5685.71	5277.67	Nfkb2	0.945
ENSMUSG00000032316	5496.29	4859.25	5468.2	5274.58	Clk3	0.945
ENSMUSG00000041096	5268.59	5214.24	5336.43	5273.09	Tspyl2	0.945
ENSMUSG00000044017	3990.98	4667.8	7156.03	5271.6	Adgrd1	0.945
ENSMUSG00000030678	5410.9	5217.12	5176.43	5268.15	Maz	0.945
ENSMUSG00000058569	4399.98	5649.08	5753.68	5267.58	Tmed9	0.945
ENSMUSG00000032480	4962.89	5493.23	5339.57	5265.23	Dhx30	0.945
ENSMUSG00000036057	5356.09	5183.45	5255.91	5265.15	Ptpn23	0.945
ENSMUSG00000020063	5857.86	4536	5398.13	5264	Sirt1	0.945
ENSMUSG00000020074	5426.72	5080.52	5276.82	5261.35	Ccar1	0.945
ENSMUSG00000039263	5483.64	5043	5248.59	5258.41	Npepl1	0.945
ENSMUSG00000027751	4998.73	5389.33	5381.4	5256.49	Supt20	0.945
ENSMUSG00000005534	5609.08	4969.88	5176.43	5251.8	Insr	0.945
ENSMUSG00000046768	4172.29	5896.32	5673.16	5247.26	Rhoj	0.945
ENSMUSG00000051335	4997.68	5823.21	4909.77	5243.55	Gfod1	0.945
ENSMUSG00000062234	5056.71	5660.62	5007.02	5241.45	Gak	0.945
ENSMUSG00000024593	5584.84	6261.9	3873.44	5240.06	Megf10	0.944
ENSMUSG00000040857	6089.77	4733.22	4885.72	5236.24	Erf	0.944
ENSMUSG00000020790	5139.99	5322.95	5236.04	5232.99	Ankfy1	0.944
ENSMUSG00000032366	4773.15	5017.02	5898	5229.39	Tpm1	0.944
ENSMUSG00000029231	3741.14	5634.65	6305.84	5227.21	Pdgfra	0.944
ENSMUSG00000024566	5279.14	5187.3	5199.44	5221.96	Atp9b	0.944
ENSMUSG00000015733	5147.37	5445.13	5051.99	5214.83	Capza2	0.944
ENSMUSG00000001036	5139.99	5128.62	5370.94	5213.18	Epn2	0.944
ENSMUSG00000020092	4354.65	6431.21	4850.16	5212.01	Pald1	0.944
ENSMUSG00000025366	4784.74	5252.72	5591.59	5209.69	Esyt1	0.944
ENSMUSG00000051790	5287.57	4865.02	5472.38	5208.32	Nlgn2	0.944
ENSMUSG00000047976	4684.6	3829.87	7107.92	5207.46	Kcna1	0.944
ENSMUSG00000024095	5523.7	5218.09	4872.12	5204.63	Hnrnpll	0.944
ENSMUSG00000015094	4601.32	5176.72	5833.16	5203.73	Npdc1	0.944
ENSMUSG00000020964	4910.19	5212.31	5482.84	5201.78	Sel1l	0.944
ENSMUSG00000030447	4983.98	5473.99	5147.15	5201.71	Cyfip1	0.944
ENSMUSG00000019997	6224.7	2817.81	6561	5201.17	Ctgf	0.944
ENSMUSG00000041959	4839.56	4564.86	6194.99	5199.8	S100a10	0.944
ENSMUSG00000021814	4901.75	5248.87	5444.14	5198.26	Anxa7	0.944
ENSMUSG00000066568	5158.96	5316.21	5115.78	5196.99	Lsm14a	0.944
ENSMUSG00000022280	5559.54	4760.16	5270.55	5196.75	Rnf19a	0.944
ENSMUSG00000029186	5679.71	5586.55	4319.97	5195.41	Pi4k2b	0.944
ENSMUSG00000030533	5530.02	4682.23	5369.9	5194.05	Unc45a	0.944
ENSMUSG00000028559	4815.31	5445.13	5315.52	5191.99	Osbpl9	0.944
ENSMUSG00000039844	5039.85	5490.34	5044.67	5191.62	Rapgef1	0.944
ENSMUSG00000027806	6145.64	4507.14	4921.27	5191.35	Tsc22d2	0.944
ENSMUSG00000032295	5225.37	4988.16	5359.44	5190.99	Man2c1	0.944
ENSMUSG00000013858	5205.35	5090.14	5276.82	5190.77	Tmem259	0.944
ENSMUSG00000017607	7140.75	3137.2	5283.1	5187.02	Tns4	0.944
ENSMUSG00000047284	4822.69	5349.89	5387.67	5186.75	Neurl4	0.944
ENSMUSG00000022867	5262.27	5161.33	5135.65	5186.41	Usp25	0.944
ENSMUSG00000037416	5339.22	5143.05	5064.54	5182.27	Dmxl1	0.943
ENSMUSG00000002325	5127.34	5435.51	4965.19	5176.01	Irf9	0.943
ENSMUSG00000032582	4944.97	5153.63	5427.41	5175.34	Rbm6	0.943
ENSMUSG00000073700	6114.01	4481.17	4927.55	5174.24	Klhl21	0.943
ENSMUSG00000022146	4818.48	5064.16	5631.33	5171.32	Osmr	0.943
ENSMUSG00000014077	5324.46	4854.44	5332.25	5170.38	Chp1	0.943
ENSMUSG00000009575	5396.15	5195.96	4911.86	5167.99	Cbx5	0.943
ENSMUSG00000021830	5158.96	5408.57	4909.77	5159.1	Txndc16	0.943
ENSMUSG00000038587	4682.49	5323.91	5465.06	5157.15	Akap12	0.943
ENSMUSG00000024294	5690.25	4910.23	4859.57	5153.35	Mib1	0.943
ENSMUSG00000074578	4857.48	5327.76	5267.41	5150.88	NA	0.943
ENSMUSG00000000131	5131.56	5138.24	5177.48	5149.09	Xpo6	0.943
ENSMUSG00000022000	5145.26	5323.91	4973.56	5147.58	Zc3h13	0.943
ENSMUSG00000038481	4949.19	5217.12	5274.73	5147.02	Cdk19	0.943
ENSMUSG00000019873	4894.37	5270.04	5270.55	5144.99	Reep3	0.943
ENSMUSG00000059273	5126.29	5406.65	4899.31	5144.08	Zc3h4	0.943
ENSMUSG00000020741	5415.12	5192.11	4824.02	5143.75	Cluh	0.943
ENSMUSG00000042423	5533.18	4802.49	5093.82	5143.16	Fbrs	0.943
ENSMUSG00000058056	6086.61	3765.41	5567.54	5139.85	Palld	0.943
ENSMUSG00000026413	6543.05	3152.59	5718.13	5137.92	Pkp1	0.943
ENSMUSG00000025364	5507.88	5241.18	4662.97	5137.34	Pa2g4	0.943
ENSMUSG00000025224	4814.26	5403.76	5188.98	5135.67	Gbf1	0.943
ENSMUSG00000039835	5652.3	4600.46	5151.33	5134.7	Nhsl1	0.943
ENSMUSG00000041028	5069.36	5322.95	5001.79	5131.37	Ghitm	0.943
ENSMUSG00000027808	5163.18	5151.71	5076.04	5130.31	Serp1	0.943
ENSMUSG00000041773	5331.84	5121.88	4922.32	5125.35	Enc1	0.943
ENSMUSG00000025228	4937.59	5247.91	5178.52	5121.34	Actr1a	0.943
ENSMUSG00000022136	4826.91	5336.42	5200.48	5121.27	Dnajc3	0.943
ENSMUSG00000028381	4598.16	6269.59	4493.56	5120.44	Ugcg	0.943
ENSMUSG00000055762	5319.19	5059.35	4970.42	5116.32	Eef1d	0.943
ENSMUSG00000066415	5071.47	5280.62	4989.24	5113.78	Msl2	0.943
ENSMUSG00000099083	5381.39	4795.75	5163.88	5113.67	Atf7	0.942
ENSMUSG00000030120	5215.89	5235.4	4879.44	5110.24	Mlf2	0.942
ENSMUSG00000009073	5076.74	5179.61	5063.49	5106.61	Nf2	0.942
ENSMUSG00000051285	5337.11	4928.51	5048.85	5104.83	Pcmtd1	0.942
ENSMUSG00000024063	4956.57	5944.42	4408.86	5103.28	Lbh	0.942
ENSMUSG00000038780	5115.74	5065.12	5125.19	5102.02	Smurf1	0.942
ENSMUSG00000028426	5311.81	5140.16	4833.43	5095.13	Rad23b	0.942
ENSMUSG00000020716	5207.45	5259.45	4817.74	5094.88	Nf1	0.942
ENSMUSG00000020705	5074.63	5169.98	5033.17	5092.59	Ddx42	0.942
ENSMUSG00000058835	5231.7	5005.48	5037.35	5091.51	Abi1	0.942
ENSMUSG00000018378	4790.01	5374.9	5103.23	5089.38	2210416O15Rik	0.942
ENSMUSG00000005320	5386.66	4044.4	5836.3	5089.12	Fgfr4	0.942
ENSMUSG00000056493	5073.58	5330.64	4850.16	5084.79	Foxk1	0.942
ENSMUSG00000047417	4900.7	5321.99	5023.75	5082.15	Rexo1	0.942
ENSMUSG00000033149	4958.68	5253.68	5033.17	5081.84	Phldb2	0.942
ENSMUSG00000031392	4891.21	5325.83	5024.8	5080.62	Irak1	0.942
ENSMUSG00000073639	4978.71	5343.15	4912.91	5078.25	Rab18	0.942
ENSMUSG00000067336	5208.51	4822.69	5197.35	5076.18	Bmpr2	0.942
ENSMUSG00000024498	5102.04	5123.81	5000.75	5075.53	Tcerg1	0.942
ENSMUSG00000040549	5100.99	5219.05	4903.49	5074.51	Ckap5	0.942
ENSMUSG00000022994	4887	4876.56	5457.74	5073.77	Adcy6	0.942
ENSMUSG00000047213	5301.27	5001.63	4905.58	5069.5	Ythdf3	0.942
ENSMUSG00000032359	3502.91	5064.16	6640.47	5069.18	Ctsh	0.942
ENSMUSG00000054766	5416.17	4924.67	4859.57	5066.8	Set	0.942
ENSMUSG00000029860	5056.71	4848.66	5292.51	5065.96	Zyx	0.942
ENSMUSG00000042506	5322.36	4815.96	5059.31	5065.87	Usp22	0.942
ENSMUSG00000004789	4888.05	5233.48	5075	5065.51	Dlst	0.942
ENSMUSG00000031532	4916.51	5247.91	5025.85	5063.42	Saraf	0.942
ENSMUSG00000078515	5417.23	4787.09	4980.88	5061.73	Ddi2	0.942
ENSMUSG00000003380	4537.02	5448.98	5191.07	5059.02	Rabac1	0.942
ENSMUSG00000094870	5564.81	4694.74	4909.77	5056.44	Zfp131	0.942
ENSMUSG00000033902	5501.56	4536.96	5118.92	5052.48	Mapkbp1	0.941
ENSMUSG00000055296	5284.41	4730.33	5139.83	5051.52	Tmem245	0.941
ENSMUSG00000063856	4525.43	5141.12	5483.88	5050.14	Gpx1	0.941
ENSMUSG00000037791	4929.16	5205.58	5014.34	5049.69	Phf12	0.941
ENSMUSG00000032186	4366.25	5006.44	5770.42	5047.7	Tmod2	0.941
ENSMUSG00000024074	5813.58	4281.06	5040.49	5045.04	Crim1	0.941
ENSMUSG00000018736	5138.93	4703.4	5292.51	5044.95	Ndel1	0.941
ENSMUSG00000041841	5099.93	5181.53	4850.16	5043.87	Rpl37	0.941
ENSMUSG00000038058	4131.18	5863.61	5135.65	5043.48	Nod1	0.941
ENSMUSG00000026790	4965	4779.4	5376.17	5040.19	Odf2	0.941
ENSMUSG00000040123	5233.81	4943.91	4930.68	5036.13	Zmym5	0.941
ENSMUSG00000022403	4896.48	5425.89	4779.05	5033.81	St13	0.941
ENSMUSG00000017478	4866.97	5044.92	5186.89	5032.93	Zc3h18	0.941
ENSMUSG00000006024	4965	4975.65	5150.29	5030.31	Napa	0.941
ENSMUSG00000020358	5657.57	5093.98	4338.79	5030.12	Hnrnpab	0.941
ENSMUSG00000022365	4792.12	5111.3	5182.71	5028.71	Derl1	0.941
ENSMUSG00000032966	4762.61	5538.44	4778	5026.35	Fkbp1a	0.941
ENSMUSG00000071176	4840.61	4522.53	5702.44	5021.86	Arhgef10	0.941
ENSMUSG00000017670	4566.54	5147.86	5350.03	5021.47	Elmo2	0.941
ENSMUSG00000005698	4858.53	5241.18	4962.06	5020.59	Ctcf	0.941
ENSMUSG00000046201	4911.24	4949.68	5195.26	5018.72	Scaf8	0.941
ENSMUSG00000029238	5160.02	4898.69	4995.52	5018.08	Clock	0.941
ENSMUSG00000006281	5013.49	4904.46	5132.51	5016.82	Tep1	0.941
ENSMUSG00000021484	4849.05	5212.31	4988.2	5016.52	Lman2	0.941
ENSMUSG00000025139	5022.98	5059.35	4964.15	5015.49	Tollip	0.941
ENSMUSG00000001918	5285.46	4418.63	5338.52	5014.21	Slc1a5	0.941
ENSMUSG00000021408	5281.24	4691.85	5062.45	5011.85	Ripk1	0.941
ENSMUSG00000025239	5214.83	4997.78	4811.47	5008.03	Limd1	0.941
ENSMUSG00000036636	4716.22	5361.43	4939.05	5005.57	Clcn7	0.941
ENSMUSG00000069601	5134.72	3766.37	6115.51	5005.53	Ank3	0.941
ENSMUSG00000037062	4931.27	5104.57	4976.7	5004.18	Sh3glb1	0.941
ENSMUSG00000005936	4905.97	5103.6	4999.7	5003.09	Kctd20	0.94
ENSMUSG00000000631	5226.43	4295.49	5487.02	5002.98	Myo18a	0.94
ENSMUSG00000042035	4837.45	5579.81	4586.63	5001.3	Igsf3	0.94
ENSMUSG00000036112	4938.65	5290.24	4771.73	5000.21	Metap2	0.94
ENSMUSG00000020530	5015.6	4998.74	4984.02	4999.45	Ggnbp2	0.94
ENSMUSG00000029201	5546.89	4188.71	5260.09	4998.56	Ugdh	0.94
ENSMUSG00000020029	5157.91	4889.07	4946.37	4997.78	Nudt4	0.94
ENSMUSG00000034471	4046.85	5942.5	4995.52	4994.95	Caskin2	0.94
ENSMUSG00000025609	4903.86	5122.85	4951.6	4992.77	Mkln1	0.94
ENSMUSG00000000416	4838.5	5769.33	4363.89	4990.58	Cttnbp2	0.94
ENSMUSG00000003617	3084.42	6791.02	5092.77	4989.4	Cp	0.94
ENSMUSG00000021782	5105.2	4653.37	5208.85	4989.14	Dlg5	0.94
ENSMUSG00000032745	4995.57	5030.49	4939.05	4988.37	Gpbp1	0.94
ENSMUSG00000055447	4360.98	5161.33	5420.09	4980.8	Cd47	0.94
ENSMUSG00000021186	3177.18	5657.74	6105.05	4979.99	Fbln5	0.94
ENSMUSG00000007891	4747.85	5285.43	4906.63	4979.97	Ctsd	0.94
ENSMUSG00000032536	4817.42	4798.64	5316.56	4977.54	Trak1	0.94
ENSMUSG00000028991	4748.9	5284.47	4880.49	4971.29	Mtor	0.94
ENSMUSG00000024759	5123.12	4998.74	4791.6	4971.15	Atl3	0.94
ENSMUSG00000022533	5216.94	5148.82	4543.76	4969.84	Atp13a3	0.94
ENSMUSG00000061740	4551.78	5241.18	5114.73	4969.23	Cyp2d22	0.94
ENSMUSG00000051910	4967.11	5486.49	4451.73	4968.45	Sox6	0.94
ENSMUSG00000040681	5067.25	5029.53	4808.33	4968.37	Hmgn1	0.94
ENSMUSG00000030357	5498.4	4889.07	4516.57	4968.01	Fkbp4	0.94
ENSMUSG00000026944	4971.33	5030.49	4900.36	4967.39	Abca2	0.94
ENSMUSG00000052534	5211.67	4577.37	5094.86	4961.3	Pbx1	0.94
ENSMUSG00000028060	5068.31	4946.79	4867.94	4961.01	2810403A07Rik	0.94
ENSMUSG00000032803	5344.49	4949.68	4575.13	4956.43	Cdv3	0.94
ENSMUSG00000031508	5138.93	4848.66	4870.03	4952.54	Ankrd10	0.94
ENSMUSG00000032026	4739.42	5451.86	4659.84	4950.37	Rexo2	0.94
ENSMUSG00000002799	6596.81	3607.64	4645.19	4949.88	Jag2	0.94
ENSMUSG00000030374	4928.11	4907.35	5011.21	4948.89	Strn4	0.94
ENSMUSG00000028713	4421.07	4764.01	5656.43	4947.17	Cyp4b1	0.939
ENSMUSG00000057367	5316.03	4583.14	4940.09	4946.42	Birc2	0.939
ENSMUSG00000037286	4722.55	4981.43	5132.51	4945.5	Stag1	0.939
ENSMUSG00000024806	4768.93	6208.98	3856.7	4944.87	Mlana	0.939
ENSMUSG00000034205	3036.98	5181.53	6614.33	4944.28	Loxl2	0.939
ENSMUSG00000079018	3086.52	5036.26	6704.26	4942.35	Ly6c1	0.939
ENSMUSG00000033257	5280.19	4437.87	5100.09	4939.39	Ttll4	0.939
ENSMUSG00000060743	4941.81	5094.95	4769.64	4935.46	H3f3a	0.939
ENSMUSG00000037119	5119.96	5035.3	4650.42	4935.23	Fam91a1	0.939
ENSMUSG00000021196	5151.58	4351.29	5297.74	4933.54	Pfkp	0.939
ENSMUSG00000022517	4662.46	5119.96	5012.25	4931.56	Mgrn1	0.939
ENSMUSG00000028369	3285.76	5340.27	6165.71	4930.58	Svep1	0.939
ENSMUSG00000031862	4768.93	5015.1	4988.2	4924.08	Atp13a1	0.939
ENSMUSG00000022553	4576.02	5337.38	4858.53	4923.98	Maf1	0.939
ENSMUSG00000026353	5097.82	4896.77	4774.87	4923.15	Ubxn4	0.939
ENSMUSG00000027639	4777.36	5043.96	4935.91	4919.08	Samhd1	0.939
ENSMUSG00000031924	5032.47	5380.67	4342.97	4918.7	Cyb5b	0.939
ENSMUSG00000038175	4813.21	5138.24	4804.15	4918.53	Mylip	0.939
ENSMUSG00000026701	5024.03	4351.29	5375.12	4916.82	Prdx6	0.939
ENSMUSG00000026349	5112.58	4859.25	4774.87	4915.57	Ccnt2	0.939
ENSMUSG00000038633	4866.97	5040.11	4828.2	4911.76	Degs1	0.939
ENSMUSG00000064368	4813.21	5518.24	4403.63	4911.69	ND6	0.939
ENSMUSG00000027875	5396.15	3352.7	5983.75	4910.86	Hmgcs2	0.939
ENSMUSG00000021068	5235.92	4453.27	5041.53	4910.24	Nin	0.939
ENSMUSG00000020000	6589.43	3199.73	4934.87	4908.01	Moxd1	0.939
ENSMUSG00000022789	4791.07	5043	4886.76	4906.94	Dnm1l	0.939
ENSMUSG00000030816	4660.36	5269.07	4788.46	4905.96	Rnf40	0.939
ENSMUSG00000024981	5745.07	4308.96	4660.88	4904.97	Acsl5	0.939
ENSMUSG00000024083	4879.62	5005.48	4827.15	4904.08	Pja2	0.939
ENSMUSG00000005682	4909.13	4757.27	5044.67	4903.69	Pan2	0.939
ENSMUSG00000022508	5133.66	4500.41	5068.72	4900.93	Bcl6	0.939
ENSMUSG00000028035	4995.57	4447.5	5242.31	4895.13	Dnajb4	0.938
ENSMUSG00000021133	5245.4	4621.62	4816.7	4894.57	Susd6	0.938
ENSMUSG00000024513	4638.22	5113.22	4928.59	4893.34	Mbd2	0.938
ENSMUSG00000002885	4534.91	5829.94	4310.56	4891.8	Adgre5	0.938
ENSMUSG00000015143	5111.53	4535.04	5027.94	4891.5	Actn1	0.938
ENSMUSG00000041444	5156.86	4586.99	4924.41	4889.42	Arhgap32	0.938
ENSMUSG00000025510	4748.9	5480.72	4433.95	4887.86	Cd151	0.938
ENSMUSG00000038241	5222.21	4718.79	4720.49	4887.16	Cep250	0.938
ENSMUSG00000030104	5261.22	4463.85	4927.55	4884.2	Edem1	0.938
ENSMUSG00000024451	3152.93	7026.72	4470.56	4883.4	Arap3	0.938
ENSMUSG00000020572	5118.91	4724.56	4804.15	4882.54	Nampt	0.938
ENSMUSG00000063358	5037.74	4887.15	4722.58	4882.49	Mapk1	0.938
ENSMUSG00000026775	4565.48	4961.22	5112.64	4879.78	Yme1l1	0.938
ENSMUSG00000022897	5087.28	4634.13	4901.4	4874.27	Dyrk1a	0.938
ENSMUSG00000022255	4720.44	5110.34	4791.6	4874.13	Mtdh	0.938
ENSMUSG00000031701	5010.33	4962.18	4638.92	4870.48	Dnaja2	0.938
ENSMUSG00000001768	4545.45	5008.36	5049.9	4867.9	Rin2	0.938
ENSMUSG00000001750	4821.64	4845.78	4934.87	4867.43	Tcirg1	0.938
ENSMUSG00000058230	4979.76	4915.05	4696.44	4863.75	Arhgap35	0.938
ENSMUSG00000073702	4765.77	4973.73	4847.02	4862.17	Rpl31	0.938
ENSMUSG00000027652	4778.42	4997.78	4806.24	4860.81	Ralgapb	0.938
ENSMUSG00000007097	4395.77	4630.28	5556.04	4860.7	Atp1a2	0.938
ENSMUSG00000028402	4481.15	5137.28	4961.01	4859.81	Mpdz	0.938
ENSMUSG00000034610	4900.7	4996.82	4679.7	4859.07	Zcchc11	0.938
ENSMUSG00000023186	4736.25	4921.78	4916.04	4858.02	Vwa5a	0.938
ENSMUSG00000029407	4736.25	4747.65	5088.59	4857.5	Uso1	0.938
ENSMUSG00000033159	5031.41	4822.69	4713.17	4855.76	Cnppd1	0.938
ENSMUSG00000037465	4847.99	5077.63	4638.92	4854.85	Klf10	0.938
ENSMUSG00000025357	5054.6	4392.66	5116.83	4854.7	Dgka	0.938
ENSMUSG00000027012	4513.83	5177.68	4859.57	4850.36	Dync1i2	0.938
ENSMUSG00000021945	4813.21	4807.3	4909.77	4843.42	Zmym2	0.938
ENSMUSG00000025612	5304.43	4173.31	5049.9	4842.55	Bach1	0.937
ENSMUSG00000032115	4922.84	5013.17	4589.77	4841.93	Hyou1	0.937
ENSMUSG00000024501	4444.26	5519.2	4561.54	4841.67	Dpysl3	0.937
ENSMUSG00000037058	4847.99	4693.78	4976.7	4839.49	Paip2	0.937
ENSMUSG00000014195	5215.89	4425.37	4864.8	4835.35	Dnajc7	0.937
ENSMUSG00000026812	4914.4	4827.5	4759.18	4833.69	Tsc1	0.937
ENSMUSG00000044340	4923.89	5186.34	4384.8	4831.68	Phlpp1	0.937
ENSMUSG00000028790	4985.03	4816.92	4692.25	4831.4	Khdrbs1	0.937
ENSMUSG00000045302	4429.5	5121.88	4939.05	4830.14	Preb	0.937
ENSMUSG00000006476	4608.7	4797.68	5077.09	4827.82	Nsmf	0.937
ENSMUSG00000027087	4927.05	4311.85	5242.31	4827.07	Itgav	0.937
ENSMUSG00000027660	5100.99	4504.26	4867.94	4824.39	Skil	0.937
ENSMUSG00000031024	4781.58	5059.35	4615.91	4818.95	St5	0.937
ENSMUSG00000046985	4970.27	4848.66	4635.78	4818.24	Tapt1	0.937
ENSMUSG00000041220	6693.79	3266.11	4483.1	4814.34	Elovl6	0.937
ENSMUSG00000071076	4975.54	4175.24	5290.42	4813.73	Jund	0.937
ENSMUSG00000055333	6630.54	3231.48	4575.13	4812.38	Fat2	0.937
ENSMUSG00000068220	3430.17	5707.76	5295.65	4811.19	Lgals1	0.937
ENSMUSG00000037993	4527.53	5122.85	4775.91	4808.76	Dhx38	0.937
ENSMUSG00000018750	4549.67	4790.94	5085.45	4808.69	Zbtb4	0.937
ENSMUSG00000012114	4768.93	4879.45	4766.5	4804.96	Med15	0.937
ENSMUSG00000021767	4762.61	4930.44	4711.08	4801.37	Kat6b	0.937
ENSMUSG00000031393	4580.24	5053.58	4764.41	4799.41	Mecp2	0.937
ENSMUSG00000019055	3731.66	5599.05	5062.45	4797.72	Plod1	0.937
ENSMUSG00000079435	4705.68	4949.68	4735.13	4796.83	Rpl36a	0.937
ENSMUSG00000031529	5258.05	4646.64	4481.01	4795.23	Tnks	0.937
ENSMUSG00000028796	4933.38	5108.41	4337.75	4793.18	Phc2	0.937
ENSMUSG00000031770	4317.76	5153.63	4904.54	4791.98	Herpud1	0.937
ENSMUSG00000034075	4812.15	4945.83	4613.82	4790.6	Zdhhc5	0.937
ENSMUSG00000027230	3298.41	4641.83	6421.91	4787.38	Creb3l1	0.937
ENSMUSG00000038855	4306.16	5253.68	4801.01	4786.95	Itpkb	0.937
ENSMUSG00000031591	4374.68	5294.09	4691.21	4786.66	Asah1	0.936
ENSMUSG00000052488	4630.84	4851.55	4870.03	4784.14	Cherp	0.936
ENSMUSG00000022336	4887	4717.83	4739.31	4781.38	Eif3e	0.936
ENSMUSG00000030822	4853.26	4696.66	4781.14	4777.02	Prr14	0.936
ENSMUSG00000041852	4931.27	4662.99	4736.17	4776.81	Tcf20	0.936
ENSMUSG00000031029	4987.14	4830.39	4511.34	4776.29	Eif3f	0.936
ENSMUSG00000042772	4759.44	4863.1	4703.76	4775.43	Smg7	0.936
ENSMUSG00000034574	5098.88	4720.71	4504.02	4774.54	Daam1	0.936
ENSMUSG00000040268	4975.54	4363.8	4980.88	4773.41	Plekha1	0.936
ENSMUSG00000001211	4682.49	4829.42	4804.15	4772.02	Agpat3	0.936
ENSMUSG00000056481	2385.52	5017.98	6909.23	4770.91	Cd248	0.936
ENSMUSG00000021703	4546.51	4612	5145.06	4767.86	Serinc5	0.936
ENSMUSG00000038034	5037.74	5141.12	4111.87	4763.58	Igsf8	0.936
ENSMUSG00000024969	4956.57	4469.62	4859.57	4761.92	Mark2	0.936
ENSMUSG00000032220	5171.61	4593.72	4519.71	4761.68	Myo1e	0.936
ENSMUSG00000040651	5318.14	4375.34	4580.36	4757.95	Fam208a	0.936
ENSMUSG00000026436	4836.4	4674.54	4761.27	4757.4	Elk4	0.936
ENSMUSG00000001424	4636.11	5054.54	4581.4	4757.35	Snd1	0.936
ENSMUSG00000053436	4624.51	4783.25	4863.76	4757.17	Mapk14	0.936
ENSMUSG00000029152	4484.31	5034.34	4737.22	4751.96	Ociad1	0.936
ENSMUSG00000021417	4611.86	5101.68	4512.39	4741.98	Eci2	0.936
ENSMUSG00000030805	4718.33	4464.81	5038.39	4740.51	Stx4a	0.936
ENSMUSG00000056749	5076.74	4051.14	5086.5	4738.13	Nfil3	0.936
ENSMUSG00000030681	4259.78	5143.05	4806.24	4736.36	Mvp	0.936
ENSMUSG00000029430	5052.5	4907.35	4248.86	4736.23	Ran	0.936
ENSMUSG00000021660	4778.42	4800.56	4629.51	4736.16	Btf3	0.936
ENSMUSG00000078619	5122.07	4185.82	4900.36	4736.08	Smarcd2	0.936
ENSMUSG00000068740	5640.71	3431.58	5123.1	4731.8	Celsr2	0.936
ENSMUSG00000026031	5337.11	4520.61	4329.38	4729.03	Cflar	0.936
ENSMUSG00000027598	4664.57	4657.22	4859.57	4727.12	Itch	0.936
ENSMUSG00000026425	4442.15	5183.45	4553.17	4726.26	Srgap2	0.936
ENSMUSG00000030654	4718.33	4832.31	4621.14	4723.93	Arl6ip1	0.935
ENSMUSG00000025907	5052.5	4485.98	4631.6	4723.36	Rb1cc1	0.935
ENSMUSG00000022680	4630.84	4950.64	4580.36	4720.61	Pdxdc1	0.935
ENSMUSG00000053641	3812.83	6086.81	4256.18	4718.6	Dennd4a	0.935
[truncated: 29,154 more rows]
